# Supplementary material for: New Polymorph of β-Cyclodextrin with a Higher Bioavailability
Source: Preprints.org preprint supplement (doi:10.20944/preprints202312.0111.v1), 2023-12-04
Supplement: Supplementary file 1 [file supplementary]

## Appendix A

### New Polymorph of Beta-Cyclodextrin with a Higher Bioavailability

Askar K. Gatiatulin<sup>1\*</sup>, Ilya S. Balakhontsev<sup>1</sup>, Sofia M. Talashmanova<sup>1</sup>, Marat A. Ziganshin<sup>1</sup> and Valery V. Gorbachuk<sup>1</sup>

<sup>1</sup> A.M. Butlerov Institute of Chemistry, Kazan Federal University, 18 Kremlevskaya, 420008 Kazan, Russia  
\* Correspondence: [agatiatu@kpfu.ru](mailto:agatiatu@kpfu.ru)

#### Table of contents

|                                                                               |    |
|-------------------------------------------------------------------------------|----|
| Thermokinetic analysis of $\beta$ CD polymorphic transition.....              | 2  |
| PXRD analysis of amorphous $\beta$ CD and HP $\beta$ CD.....                  | 3  |
| PXRD data and indexing graph for $\beta$ CD polymorph III .....               | 4  |
| FTIR spectra for $\beta$ CD polymorphs I and III .....                        | 5  |
| Full-cycle TG/DSC analysis of $\beta$ CD .....                                | 6  |
| PXRD patterns of $\beta$ CD polymorph III prepared by different methods ..... | 7  |
| Molar heat capacity of $\beta$ CD polymorphs I and III.....                   | 8  |
| Approximation of hydration isotherms .....                                    | 16 |

## Thermokinetic analysis of $\beta$ CD polymorphic transition

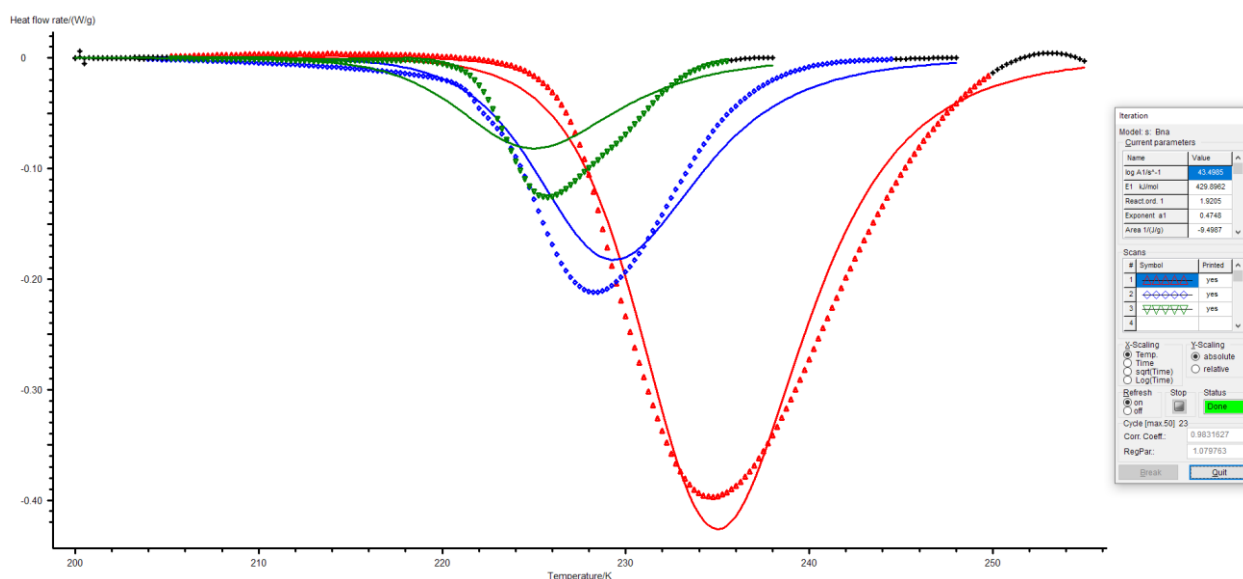

Figure A1. Correlation of experimental DSC traces (dots) of  $\beta$ CD I $\rightarrow$ III transition with the lines calculated by Bna equation (Prout-Tompkins equation for  $n$ th order autocatalytic processes). Heating rates are 4, 10, and 30 K min<sup>-1</sup>. Optimal activation energy is  $E_a = 430$  kJ/mol, reaction order  $n = 1.92$ . Correlation coefficient 0.983.

Equation Bna:  $d(1 - \alpha)/dt = A \cdot (1 - \alpha)^n \cdot (\alpha^{\text{AutocatOrder}}) \cdot e^{-E_a/(RT)}$

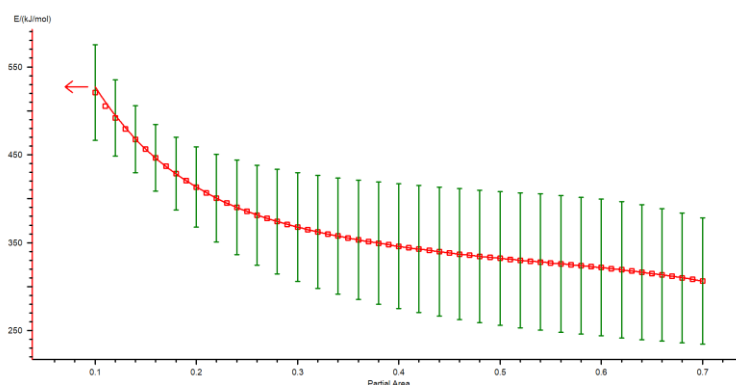

Figure A2. Friedman analysis of  $\beta$ CD polymorphic transition I $\rightarrow$ III: activation energies  $E_a$  vs. conversion degree  $\alpha$ . Heating rates are 4, 10, and 30 K min<sup>-1</sup>. Average  $E_a = 351 \pm 61$  kJ/mol.

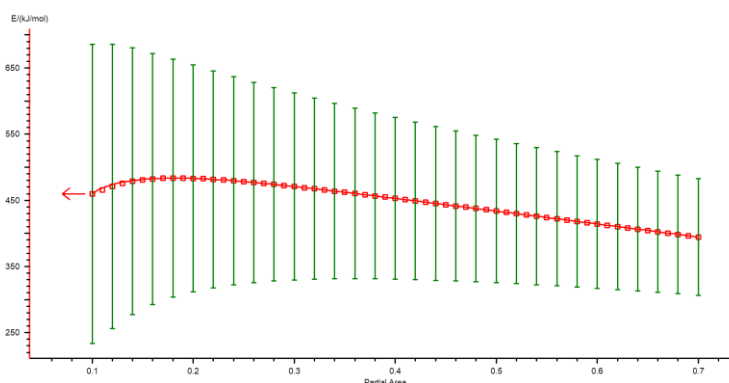

Figure A3. Ozawa-Flynn-Wall analysis of  $\beta$ CD polymorphic transition I $\rightarrow$ III: activation energies  $E_a$  vs. conversion degree  $\alpha$ . Heating rates are 4, 10, and 30 K min<sup>-1</sup>. Average  $E_a = 425 \pm 124$  kJ/mol.

### PXRD analysis of amorphous $\beta$ CD and HP $\beta$ CD

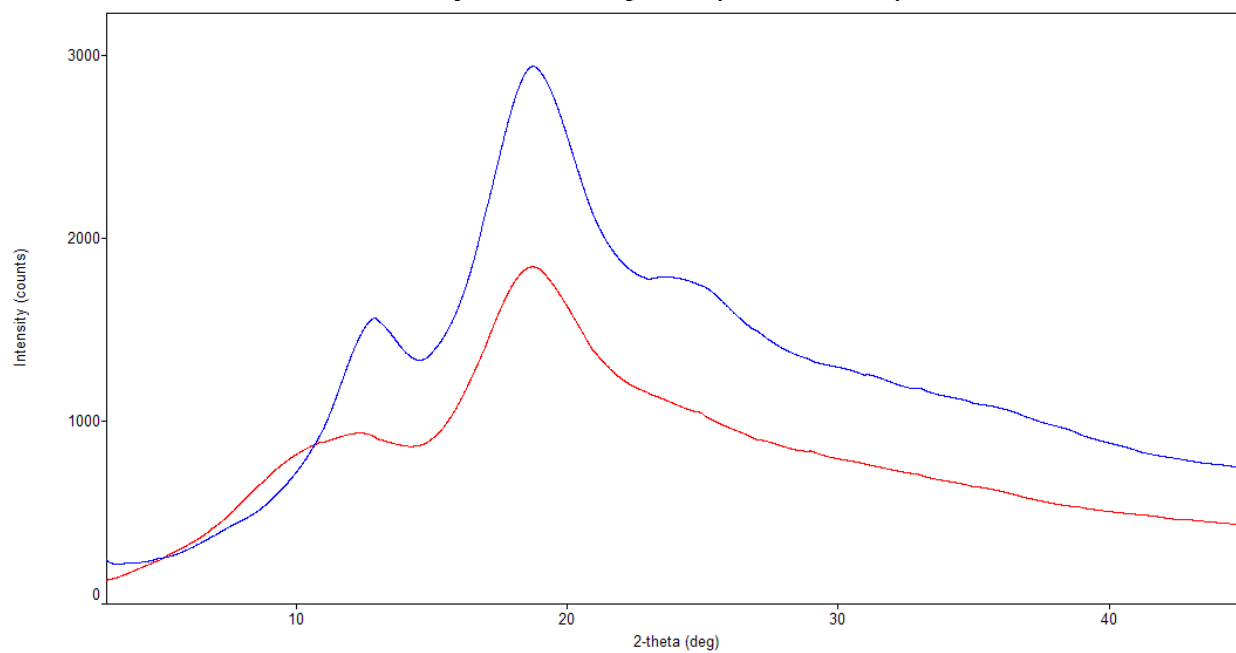

Figure A4. PXRD patterns of the amorphous  $\beta$ CD (blue) and HP $\beta$ CD (red).

# PXRD data and indexing graph for $\beta$ CD polymorph III

Table A1. PXRD data table for the polymorph III.

| $2\theta, ^\circ$ | $d, \text{\AA}$ | FWHM  | $100 \cdot I/I_{\max}$ |
|-------------------|-----------------|-------|------------------------|
| 5.46              | 16.172          | 0.246 | 1.57                   |
| 6.39              | 13.821          | 0.272 | 21.03                  |
| 7.84              | 11.267          | 0.182 | 8.45                   |
| 9.46              | 9.341           | 0.347 | 55.99                  |
| 9.69              | 9.120           | 0.345 | 7.62                   |
| 10.96             | 8.066           | 0.295 | 6.88                   |
| 12.3              | 7.190           | 0.424 | 8.32                   |
| 12.84             | 6.889           | 0.352 | 39.83                  |
| 13.39             | 6.607           | 0.647 | 21.09                  |
| 13.86             | 6.384           | 0.804 | 9.31                   |
| 14.35             | 6.167           | 0.321 | 86.49                  |
| 15.43             | 5.738           | 0.512 | 15.09                  |
| 15.73             | 5.629           | 0.357 | 58.34                  |
| 16.54             | 5.355           | 0.415 | 96.26                  |
| 16.81             | 5.270           | 0.435 | 16.03                  |
| 18.03             | 4.916           | 0.482 | 40.47                  |
| 19.23             | 4.612           | 0.399 | 100                    |
| 20.26             | 4.380           | 0.422 | 12.52                  |
| 21.43             | 4.143           | 0.762 | 2.01                   |
| 21.83             | 4.068           | 0.462 | 9.67                   |
| 22.58             | 3.935           | 0.390 | 33.95                  |
| 23.7              | 3.751           | 0.602 | 15.07                  |
| 24.02             | 3.702           | 0.735 | 16.88                  |
| 24.5              | 3.630           | 0.774 | 15.12                  |
| 24.8              | 3.587           | 0.907 | 11.95                  |
| 25.88             | 3.440           | 0.701 | 5.93                   |
| 26.43             | 3.369           | 0.824 | 8.28                   |
| 26.94             | 3.307           | 0.853 | 8.19                   |
| 27.22             | 3.273           | 0.694 | 3.14                   |
| 28.72             | 3.106           | 0.893 | 4.01                   |
| 29.63             | 3.012           | 0.496 | 9.57                   |
| 30.26             | 2.951           | 0.417 | 28.6                   |
| 31.26             | 2.859           | 0.619 | 2.67                   |
| 31.79             | 2.813           | 0.577 | 17.91                  |
| 34.01             | 2.634           | 0.707 | 6.13                   |
| 35.62             | 2.518           | 0.425 | 9.88                   |
| 36.55             | 2.456           | 0.535 | 7.09                   |
| 38.33             | 2.346           | 0.446 | 7.89                   |
| 39.28             | 2.292           | 0.390 | 3.34                   |

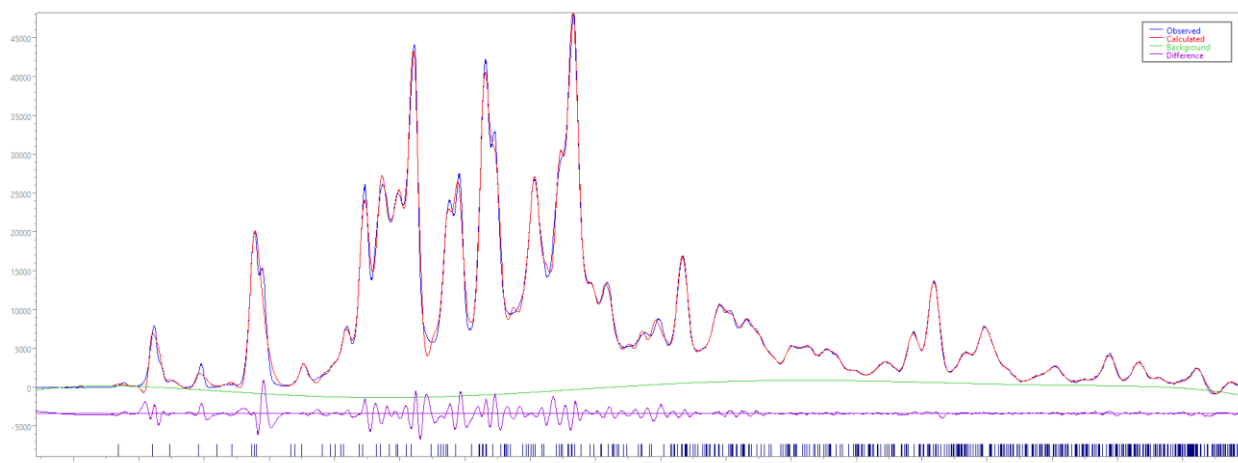

Figure A5. Experimental XRPD pattern (blue), best fit (red) and differential curve (purple) for  $\beta$ CD polymorph III ( $R_{wp} = 5.466$ ). Blue vertical bars represent Bragg positions for the calculated unit cell having P 1 space group.

### FTIR spectra for $\beta$ CD polymorphs I and III

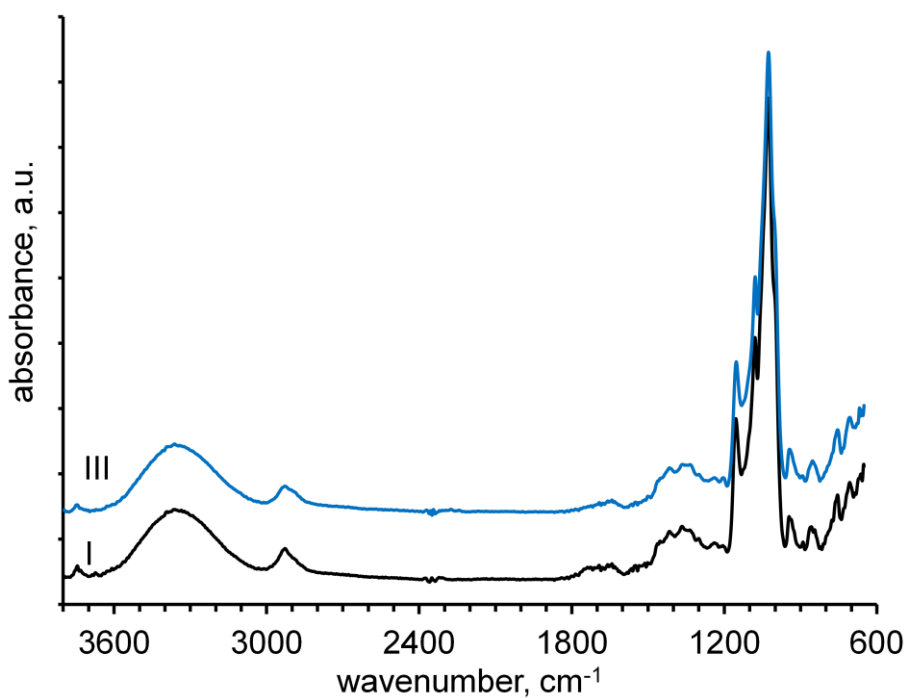

Figure A6. FTIR spectra of  $\beta$ CD polymorphs I and III.

## Full-cycle TG/DSC analysis of $\beta$ CD

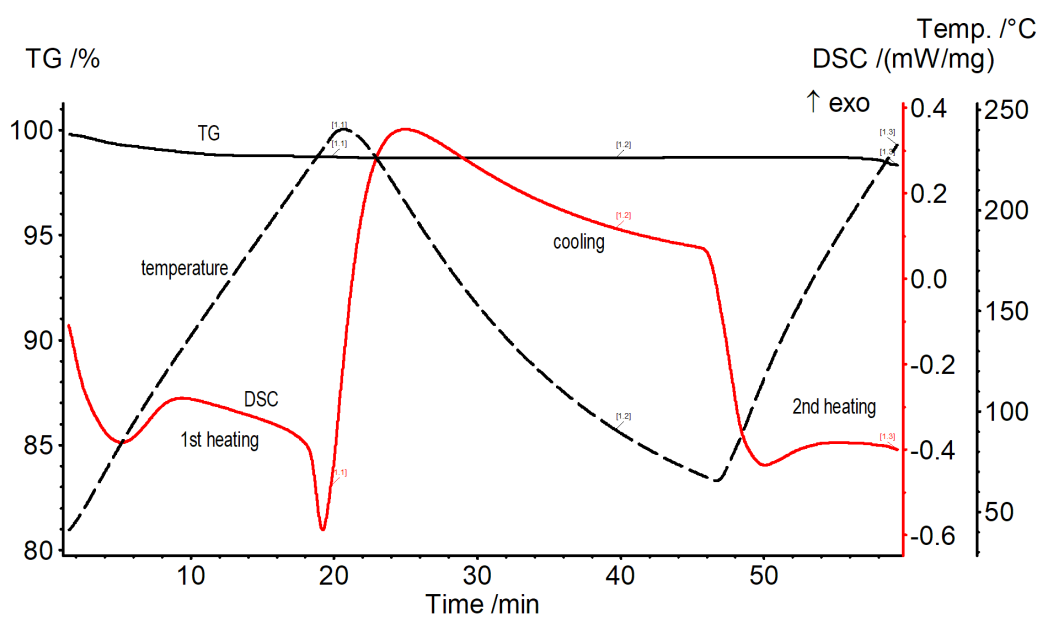

Figure A7. Curves of TG/DSC heating-cooling-heating runs for initial  $\beta$ CD Polymorph I with time for X-axis.

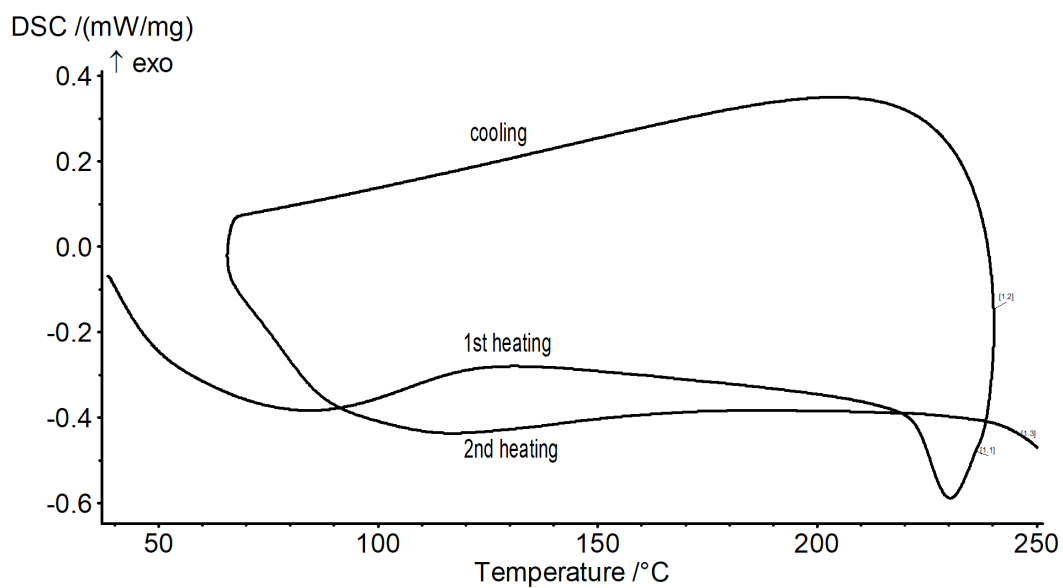

Figure A8. DSC curves of TG/DSC heating-cooling-heating runs for initial  $\beta$ CD Polymorph I with temperature for X-axis.

### PXRD patterns of $\beta$ CD polymorph III prepared by different methods

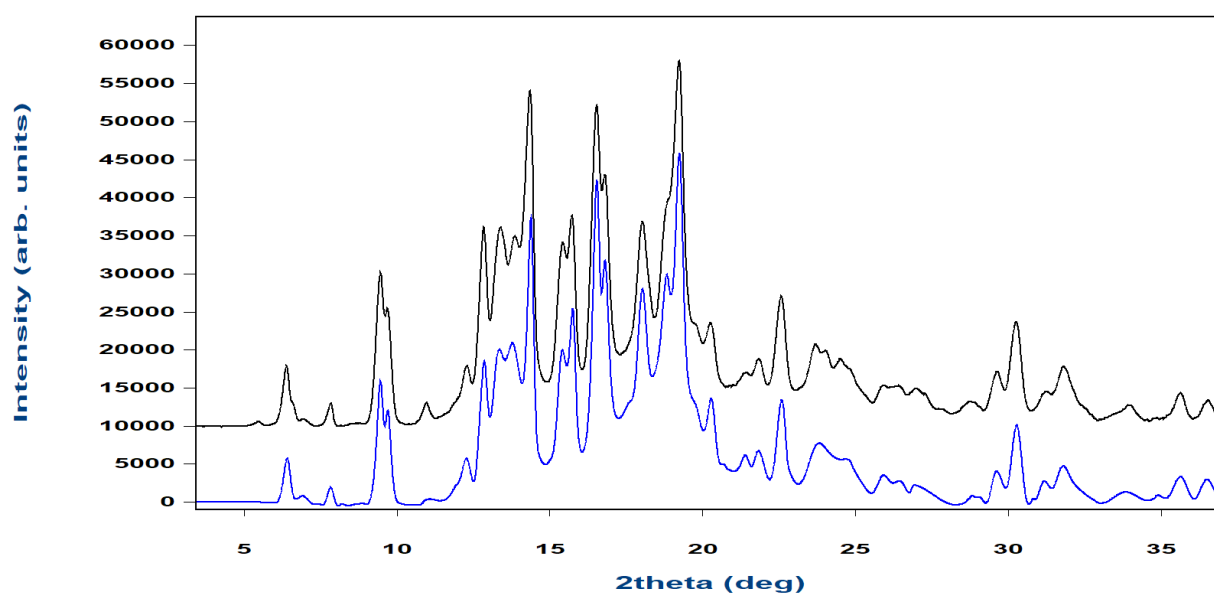

Figure A9. PXRD patterns at room temperature (RT) of  $\beta$ CD polymorph III prepared by heating to 508 K in argon flow and cooling at the rate of 10 K/min in thermal analyzer (blue line), and by heating to 505 K in oven with subsequent cooling to RT on the air (black line).

## Molar heat capacity of $\beta$ CD polymorphs I and III

Table A2. Molar heat capacity dependence on temperature for polymorphs I and III.

| $T, ^\circ\text{C}$ | $C_{\text{pm}}(\text{I})$ | $C_{\text{pm}}(\text{III})$ | $T, ^\circ\text{C}$ | $C_{\text{pm}}(\text{I})$ | $C_{\text{pm}}(\text{III})$ | $T, ^\circ\text{C}$ | $C_{\text{pm}}(\text{I})$ | $C_{\text{pm}}(\text{III})$ |
|---------------------|---------------------------|-----------------------------|---------------------|---------------------------|-----------------------------|---------------------|---------------------------|-----------------------------|
| 72.23               | 1613.71                   | 1670.07                     | 111.55              | 1849.89                   | 1893.16                     | 150.87              | 2052.82                   | 2093.65                     |
| 72.30               | 1614.06                   | 1670.17                     | 111.62              | 1850.23                   | 1893.44                     | 150.93              | 2053.12                   | 2094.06                     |
| 72.36               | 1614.41                   | 1670.59                     | 111.68              | 1850.56                   | 1893.72                     | 151.00              | 2053.37                   | 2094.23                     |
| 72.43               | 1614.69                   | 1670.69                     | 111.75              | 1850.83                   | 1893.87                     | 151.07              | 2053.73                   | 2094.39                     |
| 72.50               | 1615.12                   | 1670.80                     | 111.82              | 1851.24                   | 1894.28                     | 151.13              | 2054.10                   | 2095.04                     |
| 72.57               | 1615.63                   | 1671.54                     | 111.88              | 1851.70                   | 1894.70                     | 151.20              | 2054.41                   | 2095.21                     |
| 72.63               | 1615.99                   | 1671.97                     | 111.95              | 1852.04                   | 1895.11                     | 151.27              | 2054.71                   | 2095.61                     |
| 72.70               | 1616.27                   | 1672.08                     | 112.02              | 1852.30                   | 1895.25                     | 151.33              | 2054.96                   | 2095.78                     |
| 72.77               | 1616.70                   | 1672.19                     | 112.08              | 1852.71                   | 1895.38                     | 151.40              | 2055.33                   | 2095.95                     |
| 72.83               | 1617.14                   | 1672.94                     | 112.15              | 1853.11                   | 1896.07                     | 151.47              | 2055.69                   | 2096.59                     |
| 72.90               | 1617.50                   | 1673.05                     | 112.22              | 1853.44                   | 1896.34                     | 151.53              | 2055.94                   | 2096.76                     |
| 72.97               | 1617.86                   | 1673.49                     | 112.28              | 1853.77                   | 1896.60                     | 151.60              | 2056.32                   | 2096.92                     |
| 73.03               | 1618.15                   | 1673.60                     | 112.35              | 1854.04                   | 1896.74                     | 151.66              | 2056.74                   | 2097.57                     |
| 73.10               | 1618.59                   | 1673.72                     | 112.42              | 1854.43                   | 1897.15                     | 151.73              | 2057.05                   | 2097.97                     |
| 73.17               | 1619.10                   | 1674.47                     | 112.48              | 1854.90                   | 1897.55                     | 151.80              | 2057.31                   | 2098.14                     |
| 73.23               | 1619.47                   | 1674.91                     | 112.55              | 1855.23                   | 1897.96                     | 151.86              | 2057.68                   | 2098.31                     |
| 73.30               | 1619.75                   | 1675.03                     | 112.62              | 1855.49                   | 1898.09                     | 151.93              | 2058.06                   | 2098.95                     |
| 73.37               | 1620.20                   | 1675.15                     | 112.68              | 1855.88                   | 1898.21                     | 152.00              | 2058.36                   | 2099.12                     |
| 73.43               | 1620.64                   | 1675.92                     | 112.75              | 1856.28                   | 1898.90                     | 152.06              | 2058.69                   | 2099.53                     |
| 73.50               | 1621.01                   | 1676.04                     | 112.82              | 1856.60                   | 1899.16                     | 152.13              | 2058.94                   | 2099.70                     |
| 73.57               | 1621.38                   | 1676.49                     | 112.88              | 1856.93                   | 1899.43                     | 152.20              | 2059.32                   | 2099.87                     |
| 73.63               | 1621.66                   | 1676.61                     | 112.95              | 1857.18                   | 1899.56                     | 152.26              | 2059.76                   | 2100.52                     |
| 73.70               | 1622.11                   | 1676.74                     | 113.02              | 1857.58                   | 1899.97                     | 152.33              | 2060.08                   | 2100.93                     |
| 73.77               | 1622.64                   | 1677.51                     | 113.08              | 1858.04                   | 1900.37                     | 152.40              | 2060.35                   | 2101.11                     |
| 73.83               | 1623.00                   | 1677.96                     | 113.15              | 1858.36                   | 1900.77                     | 152.46              | 2060.73                   | 2101.28                     |
| 73.90               | 1623.30                   | 1678.09                     | 113.22              | 1858.61                   | 1900.91                     | 152.53              | 2061.10                   | 2101.94                     |
| 73.97               | 1623.75                   | 1678.23                     | 113.28              | 1859.01                   | 1901.04                     | 152.60              | 2061.43                   | 2102.12                     |
| 74.03               | 1624.20                   | 1679.00                     | 113.35              | 1859.40                   | 1901.72                     | 152.66              | 2061.76                   | 2102.53                     |
| 74.10               | 1624.57                   | 1679.14                     | 113.41              | 1859.72                   | 1901.99                     | 152.73              | 2062.03                   | 2102.72                     |
| 74.17               | 1624.94                   | 1679.60                     | 113.48              | 1860.04                   | 1902.27                     | 152.80              | 2062.42                   | 2102.90                     |
| 74.23               | 1625.24                   | 1679.74                     | 113.55              | 1860.30                   | 1902.40                     | 152.86              | 2062.87                   | 2103.57                     |
| 74.30               | 1625.69                   | 1679.88                     | 113.61              | 1860.68                   | 1902.81                     | 152.93              | 2063.20                   | 2103.99                     |
| 74.37               | 1626.21                   | 1680.66                     | 113.68              | 1861.14                   | 1903.22                     | 153.00              | 2063.48                   | 2104.18                     |
| 74.43               | 1626.59                   | 1681.12                     | 113.75              | 1861.46                   | 1903.63                     | 153.06              | 2063.87                   | 2104.37                     |
| 74.50               | 1626.88                   | 1681.26                     | 113.81              | 1861.71                   | 1903.77                     | 153.13              | 2064.27                   | 2105.04                     |
| 74.57               | 1627.34                   | 1681.41                     | 113.88              | 1862.10                   | 1903.91                     | 153.20              | 2064.61                   | 2105.23                     |
| 74.63               | 1627.78                   | 1682.19                     | 113.95              | 1862.48                   | 1904.60                     | 153.26              | 2064.94                   | 2105.67                     |
| 74.70               | 1628.16                   | 1682.34                     | 114.01              | 1862.74                   | 1904.74                     | 153.33              | 2065.23                   | 2105.87                     |
| 74.77               | 1628.54                   | 1682.81                     | 114.08              | 1863.13                   | 1904.89                     | 153.40              | 2065.63                   | 2106.07                     |
| 74.83               | 1628.83                   | 1682.97                     | 114.15              | 1863.51                   | 1905.59                     | 153.46              | 2066.08                   | 2106.74                     |
| 74.90               | 1629.29                   | 1683.12                     | 114.21              | 1863.84                   | 1905.87                     | 153.53              | 2066.42                   | 2107.19                     |
| 74.97               | 1629.81                   | 1683.91                     | 114.28              | 1864.16                   | 1906.15                     | 153.60              | 2066.71                   | 2107.39                     |
| 75.03               | 1630.19                   | 1684.39                     | 114.35              | 1864.41                   | 1906.30                     | 153.66              | 2067.11                   | 2107.60                     |
| 75.10               | 1630.48                   | 1684.54                     | 114.41              | 1864.81                   | 1906.73                     | 153.73              | 2067.51                   | 2108.28                     |
| 75.17               | 1630.93                   | 1684.70                     | 114.48              | 1865.27                   | 1907.16                     | 153.80              | 2067.86                   | 2108.49                     |
| 75.23               | 1631.38                   | 1685.50                     | 114.55              | 1865.59                   | 1907.59                     | 153.86              | 2068.20                   | 2108.93                     |
| 75.30               | 1631.75                   | 1685.66                     | 114.61              | 1865.84                   | 1907.74                     | 153.93              | 2068.49                   | 2109.14                     |
| 75.37               | 1632.13                   | 1686.14                     | 114.68              | 1866.24                   | 1907.90                     | 154.00              | 2068.89                   | 2109.36                     |
| 75.43               | 1632.43                   | 1686.31                     | 114.75              | 1866.63                   | 1908.61                     | 154.06              | 2069.35                   | 2110.04                     |
| 75.50               | 1632.87                   | 1686.47                     | 114.81              | 1866.96                   | 1908.91                     | 154.13              | 2069.70                   | 2110.49                     |
| 75.57               | 1633.40                   | 1687.27                     | 114.88              | 1867.29                   | 1909.21                     | 154.20              | 2069.98                   | 2110.70                     |
| 75.63               | 1633.77                   | 1687.75                     | 114.95              | 1867.55                   | 1909.37                     | 154.26              | 2070.39                   | 2110.92                     |
| 75.70               | 1634.06                   | 1687.93                     | 115.01              | 1867.94                   | 1909.82                     | 154.33              | 2070.79                   | 2111.60                     |
| 75.77               | 1634.51                   | 1688.10                     | 115.08              | 1868.41                   | 1910.26                     | 154.40              | 2071.13                   | 2111.81                     |
| 75.83               | 1634.95                   | 1688.90                     | 115.15              | 1868.73                   | 1910.70                     | 154.46              | 2071.47                   | 2112.26                     |
| 75.90               | 1635.32                   | 1689.08                     | 115.21              | 1869.00                   | 1910.87                     | 154.53              | 2071.75                   | 2112.47                     |
| 75.97               | 1635.69                   | 1689.56                     | 115.28              | 1869.40                   | 1911.04                     | 154.60              | 2072.15                   | 2112.68                     |
| 76.03               | 1635.98                   | 1689.74                     | 115.35              | 1869.80                   | 1911.76                     | 154.66              | 2072.60                   | 2113.36                     |
| 76.10               | 1636.43                   | 1689.92                     | 115.41              | 1870.14                   | 1912.07                     | 154.73              | 2072.94                   | 2113.81                     |
| 76.17               | 1636.95                   | 1690.72                     | 115.48              | 1870.47                   | 1912.39                     | 154.80              | 2073.22                   | 2114.01                     |
| 76.23               | 1637.31                   | 1691.22                     | 115.55              | 1870.74                   | 1912.57                     | 154.86              | 2073.62                   | 2114.22                     |
| 76.30               | 1637.60                   | 1691.39                     | 115.61              | 1871.14                   | 1913.01                     | 154.93              | 2074.01                   | 2114.89                     |
| 76.37               | 1638.04                   | 1691.57                     | 115.68              | 1871.60                   | 1913.47                     | 155.00              | 2074.34                   | 2115.09                     |
| 76.43               | 1638.48                   | 1692.37                     | 115.75              | 1871.94                   | 1913.92                     | 155.06              | 2074.67                   | 2115.52                     |
| 76.50               | 1638.77                   | 1692.56                     | 115.81              | 1872.21                   | 1914.11                     | 155.13              | 2074.95                   | 2115.72                     |
| 76.57               | 1639.22                   | 1692.74                     | 115.88              | 1872.62                   | 1914.29                     | 155.20              | 2075.34                   | 2115.92                     |
| 76.63               | 1639.65                   | 1693.54                     | 115.95              | 1873.01                   | 1915.02                     | 155.26              | 2075.78                   | 2116.58                     |
| 76.70               | 1640.02                   | 1693.73                     | 116.01              | 1873.35                   | 1915.33                     | 155.33              | 2076.11                   | 2117.01                     |
| 76.77               | 1640.38                   | 1694.22                     | 116.08              | 1873.68                   | 1915.66                     | 155.40              | 2076.38                   | 2117.20                     |
| 76.83               | 1640.66                   | 1694.40                     | 116.15              | 1873.95                   | 1915.84                     | 155.46              | 2076.76                   | 2117.39                     |
| 76.90               | 1641.10                   | 1694.59                     | 116.21              | 1874.35                   | 1916.30                     | 155.53              | 2077.13                   | 2118.04                     |
| 76.97               | 1641.62                   | 1695.40                     | 116.28              | 1874.82                   | 1916.76                     | 155.60              | 2077.45                   | 2118.22                     |
| 77.03               | 1641.98                   | 1695.89                     | 116.35              | 1875.15                   | 1917.21                     | 155.66              | 2077.77                   | 2118.64                     |
| 77.10               | 1642.26                   | 1696.07                     | 116.41              | 1875.42                   | 1917.40                     | 155.73              | 2078.04                   | 2118.81                     |

|       |         |         |        |         |         |        |         |         |
|-------|---------|---------|--------|---------|---------|--------|---------|---------|
| 77.17 | 1642.70 | 1696.26 | 116.48 | 1875.83 | 1917.59 | 155.80 | 2078.41 | 2118.99 |
| 77.23 | 1643.14 | 1697.06 | 116.55 | 1876.22 | 1918.32 | 155.86 | 2078.84 | 2119.63 |
| 77.30 | 1643.50 | 1697.25 | 116.61 | 1876.56 | 1918.64 | 155.93 | 2079.16 | 2120.03 |
| 77.37 | 1643.86 | 1697.75 | 116.68 | 1876.88 | 1918.96 | 156.00 | 2079.42 | 2120.20 |
| 77.43 | 1644.15 | 1697.93 | 116.75 | 1877.15 | 1919.15 | 156.06 | 2079.79 | 2120.36 |
| 77.50 | 1644.59 | 1698.12 | 116.81 | 1877.54 | 1919.60 | 156.13 | 2080.16 | 2120.99 |
| 77.57 | 1645.11 | 1698.93 | 116.88 | 1878.01 | 1920.05 | 156.20 | 2080.41 | 2121.15 |
| 77.63 | 1645.47 | 1699.43 | 116.95 | 1878.33 | 1920.51 | 156.26 | 2080.78 | 2121.31 |
| 77.70 | 1645.76 | 1699.61 | 117.01 | 1878.59 | 1920.70 | 156.33 | 2081.15 | 2121.93 |
| 77.76 | 1646.20 | 1699.80 | 117.08 | 1878.98 | 1920.88 | 156.40 | 2081.46 | 2122.08 |
| 77.83 | 1646.64 | 1700.61 | 117.15 | 1879.38 | 1921.60 | 156.46 | 2081.76 | 2122.47 |
| 77.90 | 1647.01 | 1700.79 | 117.21 | 1879.70 | 1921.91 | 156.53 | 2082.02 | 2122.61 |
| 77.96 | 1647.37 | 1701.29 | 117.28 | 1880.02 | 1922.23 | 156.60 | 2082.38 | 2122.76 |
| 78.03 | 1647.67 | 1701.48 | 117.35 | 1880.28 | 1922.41 | 156.66 | 2082.80 | 2123.37 |
| 78.10 | 1648.12 | 1701.67 | 117.41 | 1880.67 | 1922.86 | 156.73 | 2083.11 | 2123.75 |
| 78.16 | 1648.64 | 1702.48 | 117.48 | 1881.12 | 1923.30 | 156.80 | 2083.36 | 2123.89 |
| 78.23 | 1649.01 | 1702.98 | 117.55 | 1881.44 | 1923.75 | 156.86 | 2083.73 | 2124.03 |
| 78.30 | 1649.31 | 1703.17 | 117.61 | 1881.70 | 1923.92 | 156.93 | 2084.09 | 2124.64 |
| 78.36 | 1649.76 | 1703.36 | 117.68 | 1882.08 | 1924.09 | 157.00 | 2084.40 | 2124.77 |
| 78.43 | 1650.22 | 1704.17 | 117.75 | 1882.47 | 1924.81 | 157.06 | 2084.70 | 2125.14 |
| 78.50 | 1650.59 | 1704.36 | 117.81 | 1882.78 | 1925.11 | 157.13 | 2084.95 | 2125.28 |
| 78.56 | 1650.97 | 1704.87 | 117.88 | 1883.10 | 1925.41 | 157.20 | 2085.32 | 2125.41 |
| 78.63 | 1651.28 | 1705.06 | 117.95 | 1883.35 | 1925.59 | 157.26 | 2085.73 | 2126.01 |
| 78.70 | 1651.74 | 1705.26 | 118.01 | 1883.74 | 1926.02 | 157.33 | 2086.04 | 2126.38 |
| 78.76 | 1652.28 | 1706.07 | 118.08 | 1884.18 | 1926.45 | 157.40 | 2086.29 | 2126.51 |
| 78.83 | 1652.66 | 1706.58 | 118.15 | 1884.50 | 1926.89 | 157.46 | 2086.66 | 2126.65 |
| 78.90 | 1652.97 | 1706.78 | 118.21 | 1884.75 | 1927.05 | 157.53 | 2087.02 | 2127.25 |
| 78.96 | 1653.44 | 1706.97 | 118.28 | 1885.13 | 1927.22 | 157.60 | 2087.33 | 2127.38 |
| 79.03 | 1653.90 | 1707.79 | 118.35 | 1885.52 | 1927.91 | 157.66 | 2087.64 | 2127.74 |
| 79.10 | 1654.30 | 1707.99 | 118.41 | 1885.84 | 1928.21 | 157.73 | 2087.89 | 2127.88 |
| 79.16 | 1654.70 | 1708.50 | 118.48 | 1886.15 | 1928.50 | 157.80 | 2088.25 | 2128.01 |
| 79.23 | 1655.02 | 1708.70 | 118.55 | 1886.41 | 1928.66 | 157.86 | 2088.67 | 2128.61 |
| 79.30 | 1655.49 | 1708.91 | 118.61 | 1886.79 | 1929.08 | 157.93 | 2088.98 | 2128.97 |
| 79.36 | 1656.04 | 1709.74 | 118.68 | 1887.18 | 1929.51 | 158.00 | 2089.23 | 2129.11 |
| 79.43 | 1656.44 | 1710.25 | 118.75 | 1887.43 | 1929.67 | 158.06 | 2089.60 | 2129.24 |
| 79.50 | 1656.77 | 1710.46 | 118.81 | 1887.82 | 1930.09 | 158.13 | 2089.97 | 2129.84 |
| 79.56 | 1657.25 | 1710.67 | 118.88 | 1888.27 | 1930.51 | 158.20 | 2090.27 | 2129.98 |
| 79.63 | 1657.72 | 1711.50 | 118.95 | 1888.60 | 1930.94 | 158.26 | 2090.58 | 2130.34 |
| 79.70 | 1658.13 | 1711.70 | 119.01 | 1888.86 | 1931.09 | 158.33 | 2090.83 | 2130.48 |
| 79.76 | 1658.54 | 1712.23 | 119.08 | 1889.25 | 1931.24 | 158.40 | 2091.20 | 2130.61 |
| 79.83 | 1658.88 | 1712.43 | 119.15 | 1889.64 | 1931.93 | 158.46 | 2091.62 | 2131.22 |
| 79.89 | 1659.37 | 1712.65 | 119.21 | 1889.96 | 1932.21 | 158.53 | 2091.93 | 2131.59 |
| 79.96 | 1659.92 | 1713.48 | 119.28 | 1890.29 | 1932.49 | 158.60 | 2092.18 | 2131.73 |
| 80.03 | 1660.34 | 1714.00 | 119.35 | 1890.55 | 1932.64 | 158.66 | 2092.55 | 2131.87 |
| 80.09 | 1660.68 | 1714.22 | 119.41 | 1890.95 | 1933.07 | 158.73 | 2092.91 | 2132.47 |
| 80.16 | 1661.16 | 1714.43 | 119.48 | 1891.41 | 1933.48 | 158.80 | 2093.22 | 2132.62 |
| 80.23 | 1661.66 | 1715.26 | 119.55 | 1891.74 | 1933.89 | 158.86 | 2093.52 | 2132.99 |
| 80.29 | 1662.07 | 1715.48 | 119.61 | 1892.01 | 1934.04 | 158.93 | 2093.77 | 2133.13 |
| 80.36 | 1662.49 | 1716.00 | 119.68 | 1892.41 | 1934.19 | 159.00 | 2094.13 | 2133.28 |
| 80.43 | 1662.83 | 1716.22 | 119.75 | 1892.80 | 1934.87 | 159.06 | 2094.55 | 2133.89 |
| 80.49 | 1663.32 | 1716.44 | 119.81 | 1893.14 | 1935.15 | 159.13 | 2094.86 | 2134.27 |
| 80.56 | 1663.88 | 1717.28 | 119.88 | 1893.48 | 1935.43 | 159.20 | 2095.11 | 2134.42 |
| 80.63 | 1664.30 | 1717.80 | 119.95 | 1893.75 | 1935.58 | 159.26 | 2095.47 | 2134.56 |
| 80.69 | 1664.64 | 1718.02 | 120.01 | 1894.15 | 1935.99 | 159.33 | 2095.83 | 2135.18 |
| 80.76 | 1665.13 | 1718.24 | 120.08 | 1894.62 | 1936.40 | 159.40 | 2096.13 | 2135.33 |
| 80.83 | 1665.62 | 1719.07 | 120.15 | 1894.95 | 1936.82 | 159.46 | 2096.43 | 2135.72 |
| 80.89 | 1666.04 | 1719.29 | 120.21 | 1895.23 | 1936.96 | 159.53 | 2096.68 | 2135.87 |
| 80.96 | 1666.45 | 1719.82 | 120.28 | 1895.63 | 1937.11 | 159.60 | 2097.04 | 2136.02 |
| 81.03 | 1666.79 | 1720.04 | 120.35 | 1896.03 | 1937.79 | 159.66 | 2097.46 | 2136.65 |
| 81.09 | 1667.28 | 1720.25 | 120.41 | 1896.38 | 1938.07 | 159.73 | 2097.75 | 2137.03 |
| 81.16 | 1667.77 | 1721.09 | 120.48 | 1896.72 | 1938.34 | 159.80 | 2098.00 | 2137.19 |
| 81.23 | 1668.11 | 1721.30 | 120.55 | 1896.99 | 1938.49 | 159.86 | 2098.35 | 2137.36 |
| 81.29 | 1668.59 | 1721.52 | 120.61 | 1897.40 | 1938.90 | 159.93 | 2098.71 | 2137.98 |
| 81.36 | 1669.15 | 1722.35 | 120.68 | 1897.87 | 1939.31 | 160.00 | 2099.00 | 2138.14 |
| 81.43 | 1669.56 | 1722.87 | 120.75 | 1898.20 | 1939.72 | 160.06 | 2099.30 | 2138.54 |
| 81.49 | 1669.90 | 1723.09 | 120.81 | 1898.48 | 1939.86 | 160.13 | 2099.54 | 2138.71 |
| 81.56 | 1670.38 | 1723.30 | 120.88 | 1898.88 | 1940.00 | 160.20 | 2099.89 | 2138.87 |
| 81.63 | 1670.86 | 1724.13 | 120.95 | 1899.29 | 1940.68 | 160.26 | 2100.30 | 2139.50 |
| 81.69 | 1671.26 | 1724.34 | 121.01 | 1899.63 | 1940.96 | 160.33 | 2100.59 | 2139.91 |
| 81.76 | 1671.66 | 1724.86 | 121.08 | 1899.97 | 1941.23 | 160.40 | 2100.83 | 2140.08 |
| 81.83 | 1672.00 | 1725.07 | 121.15 | 1900.24 | 1941.38 | 160.46 | 2101.18 | 2140.25 |
| 81.89 | 1672.47 | 1725.28 | 121.21 | 1900.64 | 1941.78 | 160.53 | 2101.53 | 2140.89 |
| 81.96 | 1673.02 | 1726.10 | 121.28 | 1901.10 | 1942.19 | 160.60 | 2101.82 | 2141.07 |
| 82.03 | 1673.42 | 1726.61 | 121.35 | 1901.44 | 1942.60 | 160.66 | 2102.11 | 2141.48 |
| 82.09 | 1673.73 | 1726.81 | 121.41 | 1901.71 | 1942.74 | 160.73 | 2102.35 | 2141.66 |
| 82.16 | 1674.20 | 1727.02 | 121.48 | 1902.12 | 1942.88 | 160.80 | 2102.70 | 2141.84 |
| 82.23 | 1674.66 | 1727.84 | 121.55 | 1902.51 | 1943.56 | 160.86 | 2103.04 | 2142.48 |
| 82.29 | 1675.06 | 1728.03 | 121.61 | 1902.84 | 1943.83 | 160.93 | 2103.28 | 2142.66 |
| 82.36 | 1675.44 | 1728.54 | 121.68 | 1903.18 | 1944.11 | 161.00 | 2103.62 | 2142.85 |

|       |         |         |        |         |         |        |         |         |
|-------|---------|---------|--------|---------|---------|--------|---------|---------|
| 82.43 | 1675.75 | 1728.74 | 121.74 | 1903.44 | 1944.25 | 161.06 | 2104.03 | 2143.49 |
| 82.49 | 1676.22 | 1728.94 | 121.81 | 1903.84 | 1944.66 | 161.13 | 2104.32 | 2143.91 |
| 82.56 | 1676.75 | 1729.74 | 121.88 | 1904.30 | 1945.07 | 161.20 | 2104.55 | 2144.10 |
| 82.63 | 1677.12 | 1730.24 | 121.94 | 1904.63 | 1945.48 | 161.26 | 2104.89 | 2144.29 |
| 82.69 | 1677.43 | 1730.43 | 122.01 | 1904.89 | 1945.62 | 161.33 | 2105.24 | 2144.94 |
| 82.76 | 1677.89 | 1730.62 | 122.08 | 1905.29 | 1945.77 | 161.40 | 2105.53 | 2145.14 |
| 82.83 | 1678.34 | 1731.42 | 122.14 | 1905.68 | 1946.44 | 161.46 | 2105.82 | 2145.56 |
| 82.89 | 1678.71 | 1731.61 | 122.21 | 1906.00 | 1946.72 | 161.53 | 2106.05 | 2145.75 |
| 82.96 | 1679.09 | 1732.10 | 122.28 | 1906.33 | 1946.99 | 161.60 | 2106.40 | 2145.94 |
| 83.02 | 1679.38 | 1732.28 | 122.34 | 1906.59 | 1947.14 | 161.66 | 2106.80 | 2146.59 |
| 83.09 | 1679.84 | 1732.46 | 122.41 | 1906.98 | 1947.55 | 161.73 | 2107.09 | 2147.02 |
| 83.16 | 1680.35 | 1733.25 | 122.48 | 1907.43 | 1947.96 | 161.80 | 2107.32 | 2147.21 |
| 83.22 | 1680.72 | 1733.74 | 122.54 | 1907.76 | 1948.37 | 161.86 | 2107.67 | 2147.41 |
| 83.29 | 1681.01 | 1733.91 | 122.61 | 1908.02 | 1948.52 | 161.93 | 2108.01 | 2148.07 |
| 83.36 | 1681.46 | 1734.08 | 122.68 | 1908.41 | 1948.67 | 162.00 | 2108.31 | 2148.27 |
| 83.42 | 1681.90 | 1734.87 | 122.74 | 1908.79 | 1949.35 | 162.06 | 2108.60 | 2148.69 |
| 83.49 | 1682.27 | 1735.03 | 122.81 | 1909.12 | 1949.63 | 162.13 | 2108.83 | 2148.88 |
| 83.56 | 1682.63 | 1735.51 | 122.88 | 1909.44 | 1949.91 | 162.20 | 2109.18 | 2149.08 |
| 83.62 | 1682.92 | 1735.67 | 122.94 | 1909.69 | 1950.06 | 162.26 | 2109.58 | 2149.73 |
| 83.69 | 1683.37 | 1735.84 | 123.01 | 1910.08 | 1950.48 | 162.33 | 2109.87 | 2150.16 |
| 83.76 | 1683.88 | 1736.61 | 123.08 | 1910.53 | 1950.89 | 162.40 | 2110.11 | 2150.35 |
| 83.82 | 1684.24 | 1737.08 | 123.14 | 1910.85 | 1951.31 | 162.46 | 2110.46 | 2150.55 |
| 83.89 | 1684.54 | 1737.24 | 123.21 | 1911.11 | 1951.46 | 162.53 | 2110.81 | 2151.20 |
| 83.96 | 1684.98 | 1737.40 | 123.28 | 1911.49 | 1951.61 | 162.60 | 2111.11 | 2151.39 |
| 84.02 | 1685.41 | 1738.17 | 123.34 | 1911.88 | 1952.30 | 162.66 | 2111.40 | 2151.81 |
| 84.09 | 1685.78 | 1738.33 | 123.41 | 1912.14 | 1952.45 | 162.73 | 2111.65 | 2152.01 |
| 84.16 | 1686.15 | 1738.79 | 123.48 | 1912.53 | 1952.61 | 162.80 | 2112.01 | 2152.20 |
| 84.22 | 1686.44 | 1738.94 | 123.54 | 1912.92 | 1953.29 | 162.86 | 2112.41 | 2152.84 |
| 84.29 | 1686.88 | 1739.10 | 123.61 | 1913.24 | 1953.58 | 162.93 | 2112.71 | 2153.27 |
| 84.36 | 1687.39 | 1739.86 | 123.68 | 1913.56 | 1953.87 | 163.00 | 2112.96 | 2153.45 |
| 84.42 | 1687.76 | 1740.32 | 123.74 | 1913.82 | 1954.03 | 163.06 | 2113.32 | 2153.64 |
| 84.49 | 1688.06 | 1740.47 | 123.81 | 1914.21 | 1954.45 | 163.13 | 2113.68 | 2154.28 |
| 84.56 | 1688.50 | 1740.63 | 123.88 | 1914.66 | 1954.88 | 163.20 | 2113.99 | 2154.48 |
| 84.62 | 1688.95 | 1741.39 | 123.94 | 1914.99 | 1955.30 | 163.26 | 2114.30 | 2154.88 |
| 84.69 | 1689.33 | 1741.55 | 124.01 | 1915.25 | 1955.46 | 163.33 | 2114.56 | 2155.07 |
| 84.76 | 1689.70 | 1742.00 | 124.08 | 1915.64 | 1955.62 | 163.40 | 2114.92 | 2155.25 |
| 84.82 | 1690.00 | 1742.16 | 124.14 | 1916.03 | 1956.31 | 163.46 | 2115.34 | 2155.89 |
| 84.89 | 1690.45 | 1742.31 | 124.21 | 1916.35 | 1956.60 | 163.53 | 2115.65 | 2156.31 |
| 84.96 | 1690.98 | 1743.09 | 124.28 | 1916.68 | 1956.90 | 163.60 | 2115.91 | 2156.49 |
| 85.02 | 1691.35 | 1743.54 | 124.34 | 1916.94 | 1957.07 | 163.66 | 2116.28 | 2156.67 |
| 85.09 | 1691.66 | 1743.70 | 124.41 | 1917.33 | 1957.50 | 163.73 | 2116.65 | 2157.30 |
| 85.16 | 1692.12 | 1743.86 | 124.48 | 1917.79 | 1957.93 | 163.79 | 2116.97 | 2157.48 |
| 85.22 | 1692.58 | 1744.63 | 124.54 | 1918.11 | 1958.36 | 163.86 | 2117.29 | 2157.89 |
| 85.29 | 1692.96 | 1744.80 | 124.61 | 1918.38 | 1958.53 | 163.93 | 2117.56 | 2158.07 |
| 85.36 | 1693.35 | 1745.27 | 124.68 | 1918.77 | 1958.70 | 163.99 | 2117.94 | 2158.24 |
| 85.42 | 1693.67 | 1745.44 | 124.74 | 1919.16 | 1959.40 | 164.06 | 2118.37 | 2158.88 |
| 85.49 | 1694.14 | 1745.61 | 124.81 | 1919.49 | 1959.70 | 164.13 | 2118.69 | 2159.28 |
| 85.56 | 1694.68 | 1746.39 | 124.88 | 1919.82 | 1960.00 | 164.19 | 2118.96 | 2159.46 |
| 85.62 | 1695.07 | 1746.87 | 124.94 | 1920.08 | 1960.18 | 164.26 | 2119.34 | 2159.63 |
| 85.69 | 1695.40 | 1747.04 | 125.01 | 1920.48 | 1960.62 | 164.33 | 2119.72 | 2160.26 |
| 85.76 | 1695.87 | 1747.22 | 125.08 | 1920.94 | 1961.06 | 164.39 | 2120.05 | 2160.43 |
| 85.82 | 1696.35 | 1748.02 | 125.14 | 1921.27 | 1961.49 | 164.46 | 2120.37 | 2160.83 |
| 85.89 | 1696.68 | 1748.20 | 125.21 | 1921.53 | 1961.67 | 164.53 | 2120.64 | 2161.00 |
| 85.96 | 1697.16 | 1748.39 | 125.28 | 1921.92 | 1961.85 | 164.59 | 2121.03 | 2161.17 |
| 86.02 | 1697.64 | 1749.19 | 125.34 | 1922.32 | 1962.55 | 164.66 | 2121.47 | 2161.80 |
| 86.09 | 1698.05 | 1749.38 | 125.41 | 1922.65 | 1962.87 | 164.73 | 2121.79 | 2162.19 |
| 86.16 | 1698.46 | 1749.89 | 125.48 | 1922.97 | 1963.18 | 164.79 | 2122.06 | 2162.37 |
| 86.22 | 1698.80 | 1750.09 | 125.54 | 1923.24 | 1963.36 | 164.86 | 2122.44 | 2162.53 |
| 86.29 | 1699.29 | 1750.29 | 125.61 | 1923.64 | 1963.81 | 164.93 | 2122.83 | 2163.16 |
| 86.36 | 1699.85 | 1751.10 | 125.68 | 1924.10 | 1964.26 | 164.99 | 2123.15 | 2163.33 |
| 86.42 | 1700.27 | 1751.61 | 125.74 | 1924.42 | 1964.71 | 165.06 | 2123.48 | 2163.72 |
| 86.49 | 1700.62 | 1751.83 | 125.81 | 1924.69 | 1964.90 | 165.13 | 2123.75 | 2163.89 |
| 86.56 | 1701.12 | 1752.04 | 125.88 | 1925.09 | 1965.08 | 165.19 | 2124.13 | 2164.06 |
| 86.62 | 1701.61 | 1752.86 | 125.94 | 1925.48 | 1965.80 | 165.26 | 2124.56 | 2164.68 |
| 86.69 | 1702.04 | 1753.08 | 126.01 | 1925.81 | 1966.12 | 165.33 | 2124.89 | 2165.08 |
| 86.76 | 1702.46 | 1753.61 | 126.08 | 1926.14 | 1966.44 | 165.39 | 2125.15 | 2165.24 |
| 86.82 | 1702.81 | 1753.83 | 126.14 | 1926.41 | 1966.63 | 165.46 | 2125.52 | 2165.41 |
| 86.89 | 1703.31 | 1754.06 | 126.21 | 1926.81 | 1967.08 | 165.53 | 2125.90 | 2166.02 |
| 86.96 | 1703.89 | 1754.90 | 126.28 | 1927.26 | 1967.54 | 165.59 | 2126.16 | 2166.19 |
| 87.02 | 1704.32 | 1755.44 | 126.34 | 1927.59 | 1967.99 | 165.66 | 2126.53 | 2166.36 |
| 87.09 | 1704.68 | 1755.66 | 126.41 | 1927.85 | 1968.19 | 165.73 | 2126.91 | 2166.97 |
| 87.16 | 1705.18 | 1755.90 | 126.48 | 1928.26 | 1968.38 | 165.79 | 2127.22 | 2167.14 |
| 87.22 | 1705.68 | 1756.74 | 126.54 | 1928.65 | 1969.10 | 165.86 | 2127.52 | 2167.54 |
| 87.29 | 1706.12 | 1756.98 | 126.61 | 1928.98 | 1969.43 | 165.93 | 2127.78 | 2167.71 |
| 87.36 | 1706.55 | 1757.52 | 126.68 | 1929.31 | 1969.75 | 165.99 | 2128.15 | 2167.87 |
| 87.42 | 1706.91 | 1757.76 | 126.74 | 1929.58 | 1969.95 | 166.06 | 2128.57 | 2168.49 |
| 87.49 | 1707.41 | 1758.00 | 126.81 | 1929.98 | 1970.41 | 166.13 | 2128.87 | 2168.88 |
| 87.56 | 1707.99 | 1758.85 | 126.88 | 1930.43 | 1970.87 | 166.19 | 2129.13 | 2169.06 |
| 87.62 | 1708.42 | 1759.40 | 126.94 | 1930.77 | 1971.32 | 166.26 | 2129.49 | 2169.22 |

|       |         |         |        |         |         |        |         |         |
|-------|---------|---------|--------|---------|---------|--------|---------|---------|
| 87.69 | 1708.78 | 1759.64 | 127.01 | 1931.03 | 1971.51 | 166.33 | 2129.85 | 2169.84 |
| 87.76 | 1709.28 | 1759.89 | 127.08 | 1931.44 | 1971.71 | 166.39 | 2130.15 | 2170.01 |
| 87.82 | 1709.78 | 1760.73 | 127.14 | 1931.83 | 1972.42 | 166.46 | 2130.45 | 2170.41 |
| 87.89 | 1710.21 | 1760.97 | 127.21 | 1932.16 | 1972.74 | 166.53 | 2130.70 | 2170.58 |
| 87.96 | 1710.64 | 1761.52 | 127.28 | 1932.50 | 1973.06 | 166.59 | 2131.06 | 2170.76 |
| 88.02 | 1710.99 | 1761.76 | 127.34 | 1932.77 | 1973.25 | 166.66 | 2131.47 | 2171.38 |
| 88.09 | 1711.49 | 1762.00 | 127.41 | 1933.17 | 1973.71 | 166.73 | 2131.77 | 2171.78 |
| 88.16 | 1712.07 | 1762.85 | 127.48 | 1933.62 | 1974.15 | 166.79 | 2132.01 | 2171.96 |
| 88.22 | 1712.49 | 1763.39 | 127.54 | 1933.96 | 1974.60 | 166.86 | 2132.37 | 2172.13 |
| 88.29 | 1712.83 | 1763.62 | 127.61 | 1934.23 | 1974.79 | 166.93 | 2132.72 | 2172.76 |
| 88.36 | 1713.33 | 1763.86 | 127.68 | 1934.63 | 1974.97 | 166.99 | 2133.02 | 2172.94 |
| 88.42 | 1713.82 | 1764.70 | 127.74 | 1935.03 | 1975.67 | 167.06 | 2133.32 | 2173.35 |
| 88.49 | 1714.24 | 1764.93 | 127.81 | 1935.36 | 1975.98 | 167.13 | 2133.57 | 2173.53 |
| 88.56 | 1714.65 | 1765.47 | 127.88 | 1935.70 | 1976.30 | 167.19 | 2133.93 | 2173.72 |
| 88.62 | 1714.99 | 1765.70 | 127.94 | 1935.98 | 1976.47 | 167.26 | 2134.34 | 2174.35 |
| 88.69 | 1715.48 | 1765.93 | 128.01 | 1936.38 | 1976.91 | 167.33 | 2134.65 | 2174.76 |
| 88.76 | 1716.04 | 1766.76 | 128.08 | 1936.78 | 1977.35 | 167.39 | 2134.89 | 2174.95 |
| 88.82 | 1716.45 | 1767.28 | 128.14 | 1937.05 | 1977.52 | 167.46 | 2135.26 | 2175.15 |
| 88.89 | 1716.79 | 1767.50 | 128.21 | 1937.45 | 1977.94 | 167.53 | 2135.62 | 2175.79 |
| 88.96 | 1717.27 | 1767.73 | 128.28 | 1937.92 | 1978.37 | 167.59 | 2135.92 | 2175.98 |
| 89.02 | 1717.74 | 1768.54 | 128.34 | 1938.25 | 1978.79 | 167.66 | 2136.24 | 2176.40 |
| 89.09 | 1718.15 | 1768.77 | 128.41 | 1938.53 | 1978.96 | 167.73 | 2136.49 | 2176.60 |
| 89.16 | 1718.55 | 1769.28 | 128.48 | 1938.93 | 1979.11 | 167.79 | 2136.86 | 2176.80 |
| 89.22 | 1718.88 | 1769.49 | 128.54 | 1939.32 | 1979.80 | 167.86 | 2137.28 | 2177.45 |
| 89.29 | 1719.35 | 1769.70 | 128.61 | 1939.66 | 1980.08 | 167.93 | 2137.59 | 2177.88 |
| 89.36 | 1719.90 | 1770.52 | 128.68 | 1939.99 | 1980.37 | 167.99 | 2137.86 | 2178.08 |
| 89.42 | 1720.29 | 1771.02 | 128.74 | 1940.26 | 1980.52 | 168.06 | 2138.23 | 2178.29 |
| 89.49 | 1720.62 | 1771.23 | 128.81 | 1940.66 | 1980.93 | 168.13 | 2138.60 | 2178.94 |
| 89.56 | 1721.09 | 1771.43 | 128.88 | 1941.12 | 1981.34 | 168.19 | 2138.92 | 2179.15 |
| 89.62 | 1721.56 | 1772.23 | 128.94 | 1941.45 | 1981.75 | 168.26 | 2139.25 | 2179.58 |
| 89.69 | 1721.95 | 1772.43 | 129.01 | 1941.72 | 1981.89 | 168.33 | 2139.52 | 2179.79 |
| 89.75 | 1722.34 | 1772.93 | 129.08 | 1942.11 | 1982.04 | 168.39 | 2139.90 | 2180.01 |
| 89.82 | 1722.66 | 1773.13 | 129.14 | 1942.50 | 1982.70 | 168.46 | 2140.34 | 2180.67 |
| 89.89 | 1723.13 | 1773.32 | 129.21 | 1942.83 | 1982.97 | 168.53 | 2140.67 | 2181.10 |
| 89.95 | 1723.66 | 1774.11 | 129.28 | 1943.15 | 1983.24 | 168.59 | 2140.95 | 2181.32 |
| 90.02 | 1724.05 | 1774.60 | 129.34 | 1943.41 | 1983.38 | 168.66 | 2141.33 | 2181.53 |
| 90.09 | 1724.37 | 1774.79 | 129.41 | 1943.80 | 1983.77 | 168.73 | 2141.72 | 2182.19 |
| 90.15 | 1724.84 | 1774.98 | 129.48 | 1944.24 | 1984.17 | 168.79 | 2142.06 | 2182.40 |
| 90.22 | 1725.29 | 1775.76 | 129.54 | 1944.56 | 1984.56 | 168.86 | 2142.40 | 2182.84 |
| 90.29 | 1725.69 | 1775.95 | 129.61 | 1944.81 | 1984.70 | 168.93 | 2142.68 | 2183.05 |
| 90.35 | 1726.08 | 1776.43 | 129.68 | 1945.19 | 1984.83 | 168.99 | 2143.07 | 2183.26 |
| 90.42 | 1726.39 | 1776.61 | 129.74 | 1945.56 | 1985.49 | 169.06 | 2143.51 | 2183.92 |
| 90.49 | 1726.86 | 1776.79 | 129.81 | 1945.88 | 1985.75 | 169.13 | 2143.85 | 2184.36 |
| 90.55 | 1727.33 | 1777.57 | 129.88 | 1946.19 | 1986.01 | 169.19 | 2144.14 | 2184.57 |
| 90.62 | 1727.64 | 1777.75 | 129.94 | 1946.43 | 1986.15 | 169.26 | 2144.53 | 2184.78 |
| 90.69 | 1728.11 | 1777.92 | 130.01 | 1946.80 | 1986.54 | 169.33 | 2144.93 | 2185.43 |
| 90.75 | 1728.65 | 1778.70 | 130.08 | 1947.23 | 1986.93 | 169.39 | 2145.27 | 2185.64 |
| 90.82 | 1729.04 | 1779.16 | 130.14 | 1947.53 | 1987.33 | 169.46 | 2145.61 | 2186.07 |
| 90.89 | 1729.36 | 1779.34 | 130.21 | 1947.76 | 1987.46 | 169.53 | 2145.90 | 2186.27 |
| 90.95 | 1729.83 | 1779.51 | 130.28 | 1948.13 | 1987.60 | 169.59 | 2146.29 | 2186.48 |
| 91.02 | 1730.30 | 1780.28 | 130.34 | 1948.49 | 1988.26 | 169.66 | 2146.74 | 2187.12 |
| 91.09 | 1730.70 | 1780.45 | 130.41 | 1948.78 | 1988.52 | 169.73 | 2147.08 | 2187.54 |
| 91.15 | 1731.10 | 1780.91 | 130.48 | 1949.07 | 1988.79 | 169.79 | 2147.36 | 2187.74 |
| 91.22 | 1731.42 | 1781.08 | 130.54 | 1949.30 | 1988.93 | 169.86 | 2147.76 | 2187.94 |
| 91.29 | 1731.90 | 1781.25 | 130.61 | 1949.65 | 1989.33 | 169.93 | 2148.15 | 2188.57 |
| 91.35 | 1732.44 | 1782.01 | 130.68 | 1950.06 | 1989.73 | 169.99 | 2148.48 | 2188.76 |
| 91.42 | 1732.84 | 1782.47 | 130.74 | 1950.35 | 1990.13 | 170.06 | 2148.82 | 2189.17 |
| 91.49 | 1733.17 | 1782.64 | 130.81 | 1950.57 | 1990.28 | 170.13 | 2149.10 | 2189.36 |
| 91.55 | 1733.65 | 1782.80 | 130.88 | 1950.92 | 1990.42 | 170.19 | 2149.49 | 2189.55 |
| 91.62 | 1734.12 | 1783.56 | 130.94 | 1951.26 | 1991.09 | 170.26 | 2149.87 | 2190.17 |
| 91.69 | 1734.53 | 1783.72 | 131.01 | 1951.55 | 1991.36 | 170.33 | 2150.15 | 2190.35 |
| 91.76 | 1734.93 | 1784.18 | 131.08 | 1951.82 | 1991.64 | 170.39 | 2150.54 | 2190.53 |
| 91.82 | 1735.26 | 1784.34 | 131.14 | 1952.04 | 1991.79 | 170.46 | 2150.98 | 2191.15 |
| 91.89 | 1735.73 | 1784.50 | 131.21 | 1952.39 | 1992.20 | 170.53 | 2151.31 | 2191.55 |
| 91.96 | 1736.28 | 1785.26 | 131.27 | 1952.80 | 1992.61 | 170.59 | 2151.59 | 2191.72 |
| 92.02 | 1736.69 | 1785.71 | 131.34 | 1953.08 | 1993.03 | 170.66 | 2151.97 | 2191.89 |
| 92.09 | 1737.02 | 1785.87 | 131.41 | 1953.30 | 1993.18 | 170.73 | 2152.35 | 2192.50 |
| 92.16 | 1737.50 | 1786.03 | 131.47 | 1953.64 | 1993.34 | 170.79 | 2152.68 | 2192.67 |
| 92.22 | 1737.97 | 1786.78 | 131.54 | 1953.98 | 1994.01 | 170.86 | 2153.00 | 2193.05 |
| 92.29 | 1738.38 | 1786.94 | 131.61 | 1954.27 | 1994.29 | 170.93 | 2153.27 | 2193.22 |
| 92.36 | 1738.78 | 1787.39 | 131.67 | 1954.55 | 1994.58 | 170.99 | 2153.65 | 2193.38 |
| 92.42 | 1739.12 | 1787.55 | 131.74 | 1954.77 | 1994.74 | 171.06 | 2154.08 | 2193.99 |
| 92.49 | 1739.60 | 1787.70 | 131.81 | 1955.12 | 1995.16 | 171.13 | 2154.40 | 2194.37 |
| 92.56 | 1740.15 | 1788.45 | 131.87 | 1955.53 | 1995.58 | 171.19 | 2154.66 | 2194.53 |
| 92.62 | 1740.55 | 1788.91 | 131.94 | 1955.81 | 1995.99 | 171.26 | 2155.04 | 2194.69 |
| 92.69 | 1740.88 | 1789.06 | 132.01 | 1956.03 | 1996.16 | 171.33 | 2155.41 | 2195.29 |
| 92.76 | 1741.36 | 1789.22 | 132.07 | 1956.39 | 1996.32 | 171.39 | 2155.73 | 2195.45 |
| 92.82 | 1741.83 | 1789.97 | 132.14 | 1956.74 | 1997.00 | 171.46 | 2156.06 | 2195.83 |
| 92.89 | 1742.23 | 1790.12 | 132.21 | 1957.03 | 1997.29 | 171.53 | 2156.32 | 2195.99 |

|       |         |         |        |         |         |        |         |         |
|-------|---------|---------|--------|---------|---------|--------|---------|---------|
| 92.95 | 1742.64 | 1790.58 | 132.27 | 1957.33 | 1997.58 | 171.59 | 2156.69 | 2196.15 |
| 93.02 | 1742.96 | 1790.73 | 132.34 | 1957.56 | 1997.74 | 171.66 | 2157.12 | 2196.75 |
| 93.09 | 1743.44 | 1790.89 | 132.41 | 1957.92 | 1998.16 | 171.73 | 2157.43 | 2197.13 |
| 93.15 | 1743.98 | 1791.64 | 132.47 | 1958.35 | 1998.58 | 171.79 | 2157.70 | 2197.29 |
| 93.22 | 1744.38 | 1792.10 | 132.54 | 1958.65 | 1999.00 | 171.86 | 2158.07 | 2197.45 |
| 93.29 | 1744.70 | 1792.25 | 132.61 | 1958.89 | 1999.16 | 171.93 | 2158.45 | 2198.05 |
| 93.35 | 1745.17 | 1792.42 | 132.67 | 1959.26 | 1999.33 | 171.99 | 2158.77 | 2198.21 |
| 93.42 | 1745.63 | 1793.17 | 132.74 | 1959.63 | 2000.00 | 172.06 | 2159.09 | 2198.59 |
| 93.49 | 1746.03 | 1793.33 | 132.81 | 1959.88 | 2000.16 | 172.13 | 2159.35 | 2198.76 |
| 93.55 | 1746.42 | 1793.79 | 132.87 | 1960.25 | 2000.33 | 172.19 | 2159.73 | 2198.92 |
| 93.62 | 1746.74 | 1793.95 | 132.94 | 1960.63 | 2001.00 | 172.26 | 2160.16 | 2199.53 |
| 93.69 | 1747.20 | 1794.12 | 133.01 | 1960.94 | 2001.29 | 172.33 | 2160.47 | 2199.92 |
| 93.75 | 1747.73 | 1794.87 | 133.07 | 1961.26 | 2001.58 | 172.39 | 2160.75 | 2200.08 |
| 93.82 | 1748.12 | 1795.33 | 133.14 | 1961.52 | 2001.74 | 172.46 | 2161.12 | 2200.25 |
| 93.89 | 1748.43 | 1795.50 | 133.21 | 1961.91 | 2002.16 | 172.53 | 2161.50 | 2200.86 |
| 93.95 | 1748.89 | 1795.67 | 133.27 | 1962.36 | 2002.58 | 172.59 | 2161.83 | 2201.03 |
| 94.02 | 1749.34 | 1796.43 | 133.34 | 1962.68 | 2003.00 | 172.66 | 2162.15 | 2201.43 |
| 94.09 | 1749.73 | 1796.60 | 133.41 | 1962.95 | 2003.16 | 172.73 | 2162.42 | 2201.60 |
| 94.15 | 1750.11 | 1797.06 | 133.47 | 1963.34 | 2003.32 | 172.79 | 2162.80 | 2201.77 |
| 94.22 | 1750.42 | 1797.24 | 133.54 | 1963.73 | 2003.99 | 172.86 | 2163.24 | 2202.39 |
| 94.29 | 1750.87 | 1797.41 | 133.61 | 1964.07 | 2004.28 | 172.93 | 2163.57 | 2202.79 |
| 94.35 | 1751.39 | 1798.18 | 133.67 | 1964.41 | 2004.58 | 172.99 | 2163.84 | 2202.97 |
| 94.42 | 1751.76 | 1798.65 | 133.74 | 1964.68 | 2004.74 | 173.06 | 2164.23 | 2203.15 |
| 94.49 | 1752.06 | 1798.83 | 133.81 | 1965.09 | 2005.16 | 173.13 | 2164.61 | 2203.77 |
| 94.55 | 1752.51 | 1799.00 | 133.87 | 1965.55 | 2005.57 | 173.19 | 2164.94 | 2203.95 |
| 94.62 | 1752.96 | 1799.77 | 133.94 | 1965.90 | 2005.99 | 173.26 | 2165.28 | 2204.35 |
| 94.69 | 1753.33 | 1799.95 | 134.01 | 1966.18 | 2006.16 | 173.33 | 2165.55 | 2204.54 |
| 94.75 | 1753.70 | 1800.43 | 134.07 | 1966.59 | 2006.32 | 173.39 | 2165.93 | 2204.72 |
| 94.82 | 1754.00 | 1800.61 | 134.14 | 1966.99 | 2006.99 | 173.46 | 2166.38 | 2205.34 |
| 94.89 | 1754.44 | 1800.80 | 134.21 | 1967.34 | 2007.29 | 173.53 | 2166.71 | 2205.75 |
| 94.95 | 1754.96 | 1801.57 | 134.27 | 1967.69 | 2007.58 | 173.59 | 2166.99 | 2205.94 |
| 95.02 | 1755.32 | 1802.05 | 134.34 | 1967.97 | 2007.75 | 173.66 | 2167.37 | 2206.12 |
| 95.09 | 1755.62 | 1802.23 | 134.41 | 1968.39 | 2008.17 | 173.73 | 2167.76 | 2206.75 |
| 95.15 | 1756.06 | 1802.42 | 134.47 | 1968.86 | 2008.59 | 173.79 | 2168.09 | 2206.94 |
| 95.22 | 1756.50 | 1803.19 | 134.54 | 1969.21 | 2009.01 | 173.86 | 2168.42 | 2207.35 |
| 95.29 | 1756.79 | 1803.38 | 134.61 | 1969.51 | 2009.18 | 173.93 | 2168.70 | 2207.53 |
| 95.35 | 1757.23 | 1803.57 | 134.67 | 1969.92 | 2009.35 | 173.99 | 2169.08 | 2207.72 |
| 95.42 | 1757.67 | 1804.35 | 134.74 | 1970.34 | 2010.03 | 174.06 | 2169.52 | 2208.34 |
| 95.49 | 1758.03 | 1804.54 | 134.81 | 1970.69 | 2010.33 | 174.13 | 2169.84 | 2208.75 |
| 95.55 | 1758.40 | 1805.02 | 134.87 | 1971.05 | 2010.63 | 174.19 | 2170.11 | 2208.93 |
| 95.62 | 1758.69 | 1805.21 | 134.94 | 1971.34 | 2010.79 | 174.26 | 2170.50 | 2209.12 |
| 95.69 | 1759.13 | 1805.40 | 135.01 | 1971.76 | 2011.22 | 174.33 | 2170.87 | 2209.74 |
| 95.75 | 1759.64 | 1806.18 | 135.07 | 1972.24 | 2011.64 | 174.39 | 2171.19 | 2209.92 |
| 95.82 | 1760.01 | 1806.65 | 135.14 | 1972.59 | 2012.06 | 174.46 | 2171.52 | 2210.32 |
| 95.89 | 1760.30 | 1806.85 | 135.21 | 1972.89 | 2012.24 | 174.53 | 2171.78 | 2210.50 |
| 95.95 | 1760.74 | 1807.03 | 135.27 | 1973.31 | 2012.41 | 174.59 | 2172.15 | 2210.69 |
| 96.02 | 1761.18 | 1807.81 | 135.34 | 1973.73 | 2013.09 | 174.66 | 2172.57 | 2211.30 |
| 96.09 | 1761.54 | 1808.00 | 135.41 | 1974.08 | 2013.38 | 174.73 | 2172.89 | 2211.69 |
| 96.15 | 1761.91 | 1808.48 | 135.47 | 1974.44 | 2013.69 | 174.79 | 2173.15 | 2211.87 |
| 96.22 | 1762.21 | 1808.67 | 135.54 | 1974.73 | 2013.86 | 174.86 | 2173.51 | 2212.05 |
| 96.29 | 1762.65 | 1808.86 | 135.61 | 1975.15 | 2014.29 | 174.93 | 2173.87 | 2212.66 |
| 96.35 | 1763.16 | 1809.64 | 135.67 | 1975.63 | 2014.71 | 174.99 | 2174.13 | 2212.83 |
| 96.42 | 1763.53 | 1810.12 | 135.74 | 1975.99 | 2015.14 | 175.06 | 2174.49 | 2213.00 |
| 96.49 | 1763.83 | 1810.30 | 135.81 | 1976.28 | 2015.32 | 175.13 | 2174.84 | 2213.60 |
| 96.55 | 1764.27 | 1810.49 | 135.87 | 1976.70 | 2015.49 | 175.19 | 2175.14 | 2213.77 |
| 96.62 | 1764.71 | 1811.26 | 135.94 | 1977.11 | 2016.17 | 175.26 | 2175.44 | 2214.16 |
| 96.69 | 1765.08 | 1811.45 | 136.01 | 1977.47 | 2016.46 | 175.33 | 2175.68 | 2214.32 |
| 96.75 | 1765.45 | 1811.93 | 136.07 | 1977.82 | 2016.76 | 175.39 | 2176.03 | 2214.48 |
| 96.82 | 1765.76 | 1812.11 | 136.14 | 1978.11 | 2016.94 | 175.46 | 2176.42 | 2215.08 |
| 96.89 | 1766.20 | 1812.30 | 136.21 | 1978.52 | 2017.37 | 175.53 | 2176.71 | 2215.46 |
| 96.95 | 1766.72 | 1813.06 | 136.27 | 1979.00 | 2017.79 | 175.59 | 2176.94 | 2215.62 |
| 97.02 | 1767.09 | 1813.54 | 136.34 | 1979.35 | 2018.22 | 175.66 | 2177.28 | 2215.78 |
| 97.09 | 1767.40 | 1813.73 | 136.41 | 1979.64 | 2018.39 | 175.72 | 2177.62 | 2216.37 |
| 97.15 | 1767.84 | 1813.91 | 136.47 | 1980.05 | 2018.57 | 175.79 | 2177.90 | 2216.53 |
| 97.22 | 1768.29 | 1814.67 | 136.54 | 1980.45 | 2019.24 | 175.86 | 2178.18 | 2216.90 |
| 97.29 | 1768.66 | 1814.86 | 136.61 | 1980.80 | 2019.55 | 175.92 | 2178.41 | 2217.05 |
| 97.35 | 1769.04 | 1815.33 | 136.67 | 1981.14 | 2019.85 | 175.99 | 2178.74 | 2217.21 |
| 97.42 | 1769.35 | 1815.52 | 136.74 | 1981.43 | 2020.02 | 176.06 | 2179.13 | 2217.80 |
| 97.49 | 1769.80 | 1815.70 | 136.81 | 1981.83 | 2020.45 | 176.12 | 2179.40 | 2218.17 |
| 97.55 | 1770.32 | 1816.46 | 136.87 | 1982.29 | 2020.87 | 176.19 | 2179.62 | 2218.32 |
| 97.62 | 1770.70 | 1816.93 | 136.94 | 1982.64 | 2021.30 | 176.26 | 2179.95 | 2218.47 |
| 97.69 | 1771.01 | 1817.12 | 137.01 | 1982.91 | 2021.47 | 176.32 | 2180.27 | 2219.06 |
| 97.75 | 1771.46 | 1817.30 | 137.07 | 1983.31 | 2021.65 | 176.39 | 2180.55 | 2219.21 |
| 97.82 | 1771.91 | 1818.06 | 137.14 | 1983.70 | 2022.32 | 176.46 | 2180.83 | 2219.58 |
| 97.89 | 1772.29 | 1818.24 | 137.21 | 1984.03 | 2022.63 | 176.52 | 2181.04 | 2219.74 |
| 97.95 | 1772.66 | 1818.71 | 137.27 | 1984.36 | 2022.93 | 176.59 | 2181.37 | 2219.88 |
| 98.02 | 1772.97 | 1818.89 | 137.34 | 1984.63 | 2023.10 | 176.66 | 2181.76 | 2220.47 |
| 98.09 | 1773.43 | 1819.07 | 137.41 | 1985.02 | 2023.54 | 176.72 | 2182.03 | 2220.84 |
| 98.15 | 1773.95 | 1819.83 | 137.47 | 1985.41 | 2023.96 | 176.79 | 2182.25 | 2220.99 |

|        |         |         |        |         |         |        |         |         |
|--------|---------|---------|--------|---------|---------|--------|---------|---------|
| 98.22  | 1774.32 | 1820.31 | 137.54 | 1985.66 | 2024.14 | 176.86 | 2182.58 | 2221.15 |
| 98.29  | 1774.63 | 1820.49 | 137.61 | 1986.05 | 2024.57 | 176.92 | 2182.92 | 2221.74 |
| 98.35  | 1775.09 | 1820.67 | 137.67 | 1986.49 | 2025.00 | 176.99 | 2183.19 | 2221.90 |
| 98.42  | 1775.53 | 1821.43 | 137.74 | 1986.81 | 2025.43 | 177.06 | 2183.47 | 2222.27 |
| 98.49  | 1775.91 | 1821.61 | 137.81 | 1987.06 | 2025.61 | 177.12 | 2183.71 | 2222.43 |
| 98.55  | 1776.29 | 1822.09 | 137.87 | 1987.44 | 2025.79 | 177.19 | 2184.05 | 2222.59 |
| 98.62  | 1776.60 | 1822.27 | 137.94 | 1987.81 | 2026.47 | 177.26 | 2184.39 | 2223.19 |
| 98.69  | 1777.05 | 1822.45 | 138.01 | 1988.11 | 2026.78 | 177.32 | 2184.62 | 2223.34 |
| 98.75  | 1777.56 | 1823.21 | 138.07 | 1988.42 | 2027.09 | 177.39 | 2184.97 | 2223.51 |
| 98.82  | 1777.94 | 1823.68 | 138.14 | 1988.66 | 2027.27 | 177.46 | 2185.37 | 2224.11 |
| 98.89  | 1778.25 | 1823.87 | 138.20 | 1989.03 | 2027.70 | 177.52 | 2185.67 | 2224.49 |
| 98.95  | 1778.69 | 1824.05 | 138.27 | 1989.45 | 2028.14 | 177.59 | 2185.92 | 2224.65 |
| 99.02  | 1779.13 | 1824.81 | 138.34 | 1989.75 | 2028.57 | 177.66 | 2186.27 | 2224.82 |
| 99.09  | 1779.51 | 1825.00 | 138.40 | 1989.98 | 2028.76 | 177.72 | 2186.64 | 2225.42 |
| 99.15  | 1779.88 | 1825.47 | 138.47 | 1990.34 | 2028.94 | 177.79 | 2186.94 | 2225.59 |
| 99.22  | 1780.18 | 1825.66 | 138.54 | 1990.69 | 2029.62 | 177.86 | 2187.25 | 2225.98 |
| 99.29  | 1780.63 | 1825.85 | 138.60 | 1990.98 | 2029.94 | 177.92 | 2187.52 | 2226.14 |
| 99.35  | 1781.14 | 1826.61 | 138.67 | 1991.27 | 2030.25 | 177.99 | 2187.89 | 2226.31 |
| 99.42  | 1781.51 | 1827.09 | 138.74 | 1991.50 | 2030.43 | 178.06 | 2188.32 | 2226.92 |
| 99.49  | 1781.81 | 1827.28 | 138.80 | 1991.85 | 2030.87 | 178.12 | 2188.64 | 2227.30 |
| 99.55  | 1782.26 | 1827.46 | 138.87 | 1992.26 | 2031.30 | 178.19 | 2188.91 | 2227.48 |
| 99.62  | 1782.69 | 1828.23 | 138.94 | 1992.54 | 2031.74 | 178.26 | 2189.29 | 2227.65 |
| 99.69  | 1783.07 | 1828.41 | 139.00 | 1992.77 | 2031.92 | 178.32 | 2189.68 | 2228.26 |
| 99.75  | 1783.43 | 1828.88 | 139.07 | 1993.11 | 2032.11 | 178.39 | 2190.01 | 2228.43 |
| 99.82  | 1783.73 | 1829.08 | 139.14 | 1993.46 | 2032.79 | 178.46 | 2190.35 | 2228.82 |
| 99.89  | 1784.17 | 1829.26 | 139.20 | 1993.74 | 2033.09 | 178.52 | 2190.65 | 2229.00 |
| 99.95  | 1784.61 | 1830.03 | 139.27 | 1994.02 | 2033.40 | 178.59 | 2191.04 | 2229.18 |
| 100.02 | 1784.91 | 1830.21 | 139.34 | 1994.24 | 2033.58 | 178.66 | 2191.49 | 2229.78 |
| 100.09 | 1785.34 | 1830.40 | 139.40 | 1994.58 | 2034.02 | 178.72 | 2191.84 | 2230.18 |
| 100.15 | 1785.85 | 1831.17 | 139.47 | 1994.99 | 2034.45 | 178.79 | 2192.14 | 2230.35 |
| 100.22 | 1786.21 | 1831.65 | 139.54 | 1995.27 | 2034.87 | 178.86 | 2192.55 | 2230.52 |
| 100.29 | 1786.51 | 1831.83 | 139.60 | 1995.49 | 2035.05 | 178.92 | 2192.96 | 2231.13 |
| 100.35 | 1786.95 | 1832.02 | 139.67 | 1995.84 | 2035.23 | 178.99 | 2193.31 | 2231.31 |
| 100.42 | 1787.38 | 1832.78 | 139.74 | 1996.18 | 2035.91 | 179.06 | 2193.67 | 2231.70 |
| 100.49 | 1787.75 | 1832.97 | 139.80 | 1996.40 | 2036.08 | 179.12 | 2193.97 | 2231.87 |
| 100.55 | 1788.11 | 1833.44 | 139.87 | 1996.75 | 2036.26 | 179.19 | 2194.39 | 2232.05 |
| 100.62 | 1788.41 | 1833.62 | 139.94 | 1997.10 | 2036.93 | 179.26 | 2194.86 | 2232.65 |
| 100.69 | 1788.84 | 1833.81 | 140.00 | 1997.38 | 2037.23 | 179.32 | 2195.22 | 2233.04 |
| 100.75 | 1789.35 | 1834.57 | 140.07 | 1997.67 | 2037.52 | 179.39 | 2195.53 | 2233.22 |
| 100.82 | 1789.71 | 1835.04 | 140.14 | 1997.90 | 2037.69 | 179.46 | 2195.95 | 2233.40 |
| 100.89 | 1790.00 | 1835.22 | 140.20 | 1998.26 | 2038.10 | 179.52 | 2196.37 | 2234.00 |
| 100.95 | 1790.43 | 1835.40 | 140.27 | 1998.67 | 2038.52 | 179.59 | 2196.68 | 2234.17 |
| 101.02 | 1790.87 | 1836.16 | 140.34 | 1998.97 | 2038.94 | 179.66 | 2197.10 | 2234.35 |
| 101.09 | 1791.23 | 1836.34 | 140.40 | 1999.20 | 2039.11 | 179.72 | 2197.51 | 2234.96 |
| 101.15 | 1791.59 | 1836.80 | 140.47 | 1999.56 | 2039.27 | 179.79 | 2197.88 | 2235.13 |
| 101.22 | 1791.89 | 1836.98 | 140.54 | 1999.92 | 2039.93 | 179.86 | 2198.24 | 2235.52 |
| 101.29 | 1792.32 | 1837.16 | 140.60 | 2000.22 | 2040.22 | 179.92 | 2198.55 | 2235.69 |
| 101.35 | 1792.82 | 1837.90 | 140.67 | 2000.52 | 2040.51 | 179.99 | 2198.96 | 2235.86 |
| 101.42 | 1793.18 | 1838.36 | 140.74 | 2000.77 | 2040.67 | 180.06 | 2199.43 | 2236.46 |
| 101.49 | 1793.47 | 1838.54 | 140.80 | 2001.14 | 2041.08 | 180.12 | 2199.79 | 2236.85 |
| 101.55 | 1793.90 | 1838.71 | 140.87 | 2001.56 | 2041.49 | 180.19 | 2200.10 | 2237.02 |
| 101.62 | 1794.32 | 1839.45 | 140.94 | 2001.87 | 2041.89 | 180.26 | 2200.51 | 2237.19 |
| 101.69 | 1794.69 | 1839.62 | 141.00 | 2002.12 | 2042.06 | 180.32 | 2200.92 | 2237.79 |
| 101.75 | 1795.04 | 1840.08 | 141.07 | 2002.50 | 2042.22 | 180.39 | 2201.27 | 2237.97 |
| 101.82 | 1795.33 | 1840.23 | 141.14 | 2002.87 | 2042.87 | 180.46 | 2201.63 | 2238.36 |
| 101.89 | 1795.76 | 1840.40 | 141.20 | 2003.19 | 2043.16 | 180.52 | 2201.93 | 2238.53 |
| 101.95 | 1796.25 | 1841.14 | 141.27 | 2003.51 | 2043.45 | 180.59 | 2202.33 | 2238.70 |
| 102.02 | 1796.60 | 1841.59 | 141.34 | 2003.78 | 2043.60 | 180.66 | 2202.78 | 2239.30 |
| 102.09 | 1796.89 | 1841.74 | 141.40 | 2004.16 | 2044.02 | 180.72 | 2203.13 | 2239.69 |
| 102.15 | 1797.31 | 1841.90 | 141.47 | 2004.61 | 2044.43 | 180.79 | 2203.42 | 2239.86 |
| 102.22 | 1797.74 | 1842.63 | 141.54 | 2004.94 | 2044.84 | 180.86 | 2203.81 | 2240.03 |
| 102.29 | 1798.02 | 1842.79 | 141.60 | 2005.20 | 2045.00 | 180.92 | 2204.20 | 2240.63 |
| 102.35 | 1798.44 | 1842.94 | 141.67 | 2005.59 | 2045.17 | 180.99 | 2204.55 | 2240.80 |
| 102.42 | 1798.86 | 1843.67 | 141.74 | 2005.98 | 2045.83 | 181.06 | 2204.88 | 2241.20 |
| 102.49 | 1799.21 | 1843.82 | 141.80 | 2006.32 | 2046.13 | 181.12 | 2205.16 | 2241.36 |
| 102.55 | 1799.56 | 1844.26 | 141.87 | 2006.65 | 2046.42 | 181.19 | 2205.55 | 2241.54 |
| 102.62 | 1799.84 | 1844.41 | 141.94 | 2006.93 | 2046.59 | 181.26 | 2205.99 | 2242.13 |
| 102.69 | 1800.26 | 1844.55 | 142.00 | 2007.34 | 2047.01 | 181.32 | 2206.32 | 2242.52 |
| 102.75 | 1800.75 | 1845.27 | 142.07 | 2007.74 | 2047.43 | 181.39 | 2206.60 | 2242.70 |
| 102.82 | 1801.09 | 1845.70 | 142.14 | 2008.02 | 2047.61 | 181.45 | 2206.98 | 2242.87 |
| 102.89 | 1801.37 | 1845.84 | 142.20 | 2008.42 | 2048.04 | 181.52 | 2207.36 | 2243.47 |
| 102.95 | 1801.78 | 1845.99 | 142.27 | 2008.89 | 2048.46 | 181.59 | 2207.68 | 2243.64 |
| 103.02 | 1802.20 | 1846.71 | 142.34 | 2009.24 | 2048.89 | 181.65 | 2208.01 | 2244.03 |
| 103.09 | 1802.54 | 1846.85 | 142.40 | 2009.52 | 2049.07 | 181.72 | 2208.28 | 2244.20 |
| 103.15 | 1802.88 | 1847.28 | 142.47 | 2009.94 | 2049.26 | 181.79 | 2208.66 | 2244.37 |
| 103.22 | 1803.15 | 1847.42 | 142.54 | 2010.35 | 2049.94 | 181.85 | 2209.08 | 2244.97 |
| 103.29 | 1803.57 | 1847.55 | 142.60 | 2010.70 | 2050.25 | 181.92 | 2209.40 | 2245.35 |
| 103.35 | 1804.05 | 1848.27 | 142.67 | 2011.05 | 2050.56 | 181.99 | 2209.67 | 2245.53 |
| 103.42 | 1804.39 | 1848.69 | 142.74 | 2011.35 | 2050.75 | 182.05 | 2210.04 | 2245.70 |

|        |         |         |        |         |         |        |         |         |
|--------|---------|---------|--------|---------|---------|--------|---------|---------|
| 103.49 | 1804.66 | 1848.83 | 142.80 | 2011.76 | 2051.19 | 182.12 | 2210.41 | 2246.30 |
| 103.55 | 1805.07 | 1848.97 | 142.87 | 2012.24 | 2051.63 | 182.19 | 2210.74 | 2246.47 |
| 103.62 | 1805.47 | 1849.68 | 142.94 | 2012.60 | 2052.07 | 182.25 | 2211.06 | 2246.86 |
| 103.69 | 1805.81 | 1849.82 | 143.00 | 2012.90 | 2052.27 | 182.32 | 2211.33 | 2247.03 |
| 103.75 | 1806.15 | 1850.24 | 143.07 | 2013.32 | 2052.47 | 182.39 | 2211.70 | 2247.20 |
| 103.82 | 1806.41 | 1850.38 | 143.14 | 2013.75 | 2053.16 | 182.45 | 2212.13 | 2247.80 |
| 103.89 | 1806.82 | 1850.52 | 143.20 | 2014.10 | 2053.48 | 182.52 | 2212.46 | 2248.18 |
| 103.95 | 1807.29 | 1851.22 | 143.27 | 2014.46 | 2053.81 | 182.59 | 2212.73 | 2248.35 |
| 104.02 | 1807.63 | 1851.64 | 143.34 | 2014.77 | 2054.01 | 182.65 | 2213.10 | 2248.52 |
| 104.09 | 1807.89 | 1851.79 | 143.40 | 2015.19 | 2054.45 | 182.72 | 2213.48 | 2249.12 |
| 104.15 | 1808.30 | 1851.92 | 143.47 | 2015.67 | 2054.90 | 182.79 | 2213.81 | 2249.29 |
| 104.22 | 1808.70 | 1852.63 | 143.54 | 2016.03 | 2055.35 | 182.85 | 2214.14 | 2249.68 |
| 104.29 | 1809.04 | 1852.77 | 143.60 | 2016.34 | 2055.55 | 182.92 | 2214.42 | 2249.85 |
| 104.35 | 1809.37 | 1853.20 | 143.67 | 2016.76 | 2055.76 | 182.99 | 2214.81 | 2250.02 |
| 104.42 | 1809.63 | 1853.34 | 143.74 | 2017.18 | 2056.45 | 183.05 | 2215.24 | 2250.62 |
| 104.49 | 1810.03 | 1853.48 | 143.80 | 2017.55 | 2056.78 | 183.12 | 2215.58 | 2251.01 |
| 104.55 | 1810.44 | 1854.19 | 143.87 | 2017.91 | 2057.10 | 183.19 | 2215.86 | 2251.18 |
| 104.62 | 1810.70 | 1854.34 | 143.94 | 2018.21 | 2057.31 | 183.25 | 2216.25 | 2251.36 |
| 104.69 | 1811.10 | 1854.48 | 144.00 | 2018.63 | 2057.76 | 183.32 | 2216.64 | 2251.96 |
| 104.75 | 1811.57 | 1855.19 | 144.07 | 2019.11 | 2058.20 | 183.39 | 2216.99 | 2252.13 |
| 104.82 | 1811.90 | 1855.61 | 144.14 | 2019.47 | 2058.65 | 183.45 | 2217.33 | 2252.52 |
| 104.89 | 1812.16 | 1855.76 | 144.20 | 2019.77 | 2058.85 | 183.52 | 2217.62 | 2252.69 |
| 104.95 | 1812.57 | 1855.91 | 144.27 | 2020.19 | 2059.05 | 183.59 | 2218.03 | 2252.88 |
| 105.02 | 1812.96 | 1856.61 | 144.34 | 2020.61 | 2059.74 | 183.65 | 2218.48 | 2253.47 |
| 105.09 | 1813.29 | 1856.77 | 144.40 | 2020.97 | 2060.06 | 183.72 | 2218.83 | 2253.86 |
| 105.15 | 1813.63 | 1857.20 | 144.47 | 2021.32 | 2060.38 | 183.79 | 2219.13 | 2254.04 |
| 105.22 | 1813.89 | 1857.34 | 144.54 | 2021.62 | 2060.58 | 183.85 | 2219.54 | 2254.22 |
| 105.29 | 1814.30 | 1857.50 | 144.60 | 2022.03 | 2061.02 | 183.92 | 2219.95 | 2254.83 |
| 105.35 | 1814.76 | 1858.21 | 144.67 | 2022.50 | 2061.46 | 183.99 | 2220.31 | 2255.01 |
| 105.42 | 1815.09 | 1858.65 | 144.74 | 2022.85 | 2061.90 | 184.05 | 2220.67 | 2255.40 |
| 105.48 | 1815.36 | 1858.80 | 144.80 | 2023.14 | 2062.09 | 184.12 | 2220.98 | 2255.59 |
| 105.55 | 1815.76 | 1858.96 | 144.87 | 2023.55 | 2062.29 | 184.19 | 2221.40 | 2255.78 |
| 105.62 | 1816.16 | 1859.67 | 144.94 | 2023.95 | 2062.97 | 184.25 | 2221.82 | 2256.39 |
| 105.68 | 1816.49 | 1859.83 | 145.00 | 2024.30 | 2063.28 | 184.32 | 2222.13 | 2256.58 |
| 105.75 | 1816.83 | 1860.27 | 145.07 | 2024.64 | 2063.60 | 184.39 | 2222.56 | 2256.77 |
| 105.82 | 1817.09 | 1860.43 | 145.14 | 2024.92 | 2063.79 | 184.45 | 2223.03 | 2257.38 |
| 105.88 | 1817.50 | 1860.59 | 145.20 | 2025.32 | 2064.22 | 184.52 | 2223.41 | 2257.78 |
| 105.95 | 1817.97 | 1861.32 | 145.27 | 2025.77 | 2064.66 | 184.59 | 2223.73 | 2257.97 |
| 106.02 | 1818.30 | 1861.76 | 145.34 | 2026.11 | 2065.09 | 184.65 | 2224.16 | 2258.17 |
| 106.08 | 1818.57 | 1861.92 | 145.40 | 2026.38 | 2065.28 | 184.72 | 2224.59 | 2258.78 |
| 106.15 | 1818.98 | 1862.08 | 145.47 | 2026.78 | 2065.47 | 184.79 | 2224.97 | 2258.97 |
| 106.22 | 1819.39 | 1862.81 | 145.54 | 2027.17 | 2066.14 | 184.85 | 2225.35 | 2259.38 |
| 106.28 | 1819.73 | 1862.98 | 145.60 | 2027.49 | 2066.33 | 184.92 | 2225.68 | 2259.57 |
| 106.35 | 1820.07 | 1863.43 | 145.67 | 2027.81 | 2066.75 | 184.99 | 2226.11 | 2259.77 |
| 106.42 | 1820.34 | 1863.60 | 145.74 | 2028.08 | 2066.94 | 185.05 | 2226.60 | 2260.39 |
| 106.48 | 1820.76 | 1863.78 | 145.80 | 2028.46 | 2067.13 | 185.12 | 2226.98 | 2260.80 |
| 106.55 | 1821.17 | 1864.51 | 145.87 | 2028.89 | 2067.80 | 185.19 | 2227.31 | 2261.00 |
| 106.62 | 1821.51 | 1864.97 | 145.94 | 2029.21 | 2068.23 | 185.25 | 2227.75 | 2261.20 |
| 106.68 | 1821.86 | 1865.15 | 146.00 | 2029.47 | 2068.42 | 185.32 | 2228.18 | 2261.82 |
| 106.75 | 1822.14 | 1865.33 | 146.07 | 2029.84 | 2068.60 | 185.39 | 2228.56 | 2262.02 |
| 106.82 | 1822.56 | 1866.07 | 146.14 | 2030.21 | 2069.28 | 185.45 | 2228.95 | 2262.43 |
| 106.88 | 1823.04 | 1866.25 | 146.20 | 2030.53 | 2069.47 | 185.52 | 2229.28 | 2262.63 |
| 106.95 | 1823.40 | 1866.72 | 146.27 | 2030.83 | 2069.90 | 185.59 | 2229.72 | 2262.83 |
| 107.02 | 1823.68 | 1866.91 | 146.34 | 2031.08 | 2070.08 | 185.65 | 2230.20 | 2263.45 |
| 107.08 | 1824.10 | 1867.10 | 146.40 | 2031.45 | 2070.27 | 185.72 | 2230.58 | 2263.86 |
| 107.15 | 1824.53 | 1867.84 | 146.47 | 2031.87 | 2070.94 | 185.79 | 2230.91 | 2264.06 |
| 107.22 | 1824.89 | 1868.31 | 146.54 | 2032.17 | 2071.37 | 185.85 | 2231.34 | 2264.26 |
| 107.28 | 1825.25 | 1868.51 | 146.60 | 2032.41 | 2071.56 | 185.92 | 2231.77 | 2264.87 |
| 107.35 | 1825.54 | 1868.71 | 146.67 | 2032.77 | 2071.75 | 185.99 | 2232.15 | 2265.07 |
| 107.42 | 1825.97 | 1869.46 | 146.73 | 2033.12 | 2072.42 | 186.05 | 2232.52 | 2265.47 |
| 107.48 | 1826.47 | 1869.66 | 146.80 | 2033.37 | 2072.61 | 186.12 | 2232.85 | 2265.67 |
| 107.55 | 1826.83 | 1870.14 | 146.87 | 2033.71 | 2072.80 | 186.19 | 2233.27 | 2265.87 |
| 107.62 | 1827.13 | 1870.35 | 146.93 | 2034.07 | 2073.47 | 186.25 | 2233.74 | 2266.48 |
| 107.68 | 1827.57 | 1870.55 | 147.00 | 2034.36 | 2073.66 | 186.32 | 2234.11 | 2266.88 |
| 107.75 | 1828.00 | 1871.32 | 147.07 | 2034.66 | 2074.09 | 186.39 | 2234.42 | 2267.08 |
| 107.82 | 1828.37 | 1871.81 | 147.13 | 2034.89 | 2074.29 | 186.45 | 2234.84 | 2267.27 |
| 107.88 | 1828.74 | 1872.02 | 147.20 | 2035.24 | 2074.47 | 186.52 | 2235.25 | 2267.87 |
| 107.95 | 1829.04 | 1872.23 | 147.27 | 2035.65 | 2075.15 | 186.59 | 2235.61 | 2268.06 |
| 108.02 | 1829.48 | 1873.00 | 147.33 | 2035.94 | 2075.58 | 186.65 | 2235.96 | 2268.46 |
| 108.08 | 1829.99 | 1873.21 | 147.40 | 2036.18 | 2075.77 | 186.72 | 2236.27 | 2268.64 |
| 108.15 | 1830.36 | 1873.71 | 147.47 | 2036.53 | 2075.96 | 186.79 | 2236.67 | 2268.82 |
| 108.22 | 1830.66 | 1873.93 | 147.53 | 2036.87 | 2076.63 | 186.85 | 2237.12 | 2269.42 |
| 108.28 | 1831.10 | 1874.15 | 147.60 | 2037.16 | 2076.82 | 186.92 | 2237.47 | 2269.81 |
| 108.35 | 1831.55 | 1874.93 | 147.67 | 2037.45 | 2077.25 | 186.99 | 2237.75 | 2269.98 |
| 108.42 | 1831.92 | 1875.43 | 147.73 | 2037.69 | 2077.44 | 187.05 | 2238.15 | 2270.16 |
| 108.48 | 1832.30 | 1875.65 | 147.80 | 2038.03 | 2077.63 | 187.12 | 2238.54 | 2270.75 |
| 108.55 | 1832.60 | 1875.87 | 147.87 | 2038.44 | 2078.30 | 187.19 | 2238.88 | 2270.93 |
| 108.62 | 1833.05 | 1876.65 | 147.93 | 2038.73 | 2078.73 | 187.25 | 2239.20 | 2271.30 |
| 108.68 | 1833.56 | 1876.87 | 148.00 | 2038.96 | 2078.92 | 187.32 | 2239.48 | 2271.47 |

|        |         |         |        |         |         |        |         |         |
|--------|---------|---------|--------|---------|---------|--------|---------|---------|
| 108.75 | 1833.93 | 1877.37 | 148.07 | 2039.31 | 2079.11 | 187.39 | 2239.86 | 2271.64 |
| 108.82 | 1834.24 | 1877.59 | 148.13 | 2039.66 | 2079.78 | 187.45 | 2240.29 | 2272.23 |
| 108.88 | 1834.68 | 1877.81 | 148.20 | 2039.95 | 2079.97 | 187.52 | 2240.62 | 2272.60 |
| 108.95 | 1835.11 | 1878.59 | 148.27 | 2040.24 | 2080.40 | 187.59 | 2240.88 | 2272.76 |
| 109.02 | 1835.49 | 1879.09 | 148.33 | 2040.48 | 2080.59 | 187.65 | 2241.25 | 2272.93 |
| 109.08 | 1835.86 | 1879.32 | 148.40 | 2040.83 | 2080.78 | 187.72 | 2241.62 | 2273.51 |
| 109.15 | 1836.17 | 1879.53 | 148.47 | 2041.24 | 2081.45 | 187.79 | 2241.94 | 2273.67 |
| 109.22 | 1836.60 | 1880.31 | 148.53 | 2041.54 | 2081.87 | 187.85 | 2242.25 | 2274.04 |
| 109.28 | 1837.04 | 1880.53 | 148.60 | 2041.77 | 2082.06 | 187.92 | 2242.51 | 2274.19 |
| 109.35 | 1837.34 | 1880.75 | 148.67 | 2042.12 | 2082.25 | 187.99 | 2242.87 | 2274.35 |
| 109.42 | 1837.78 | 1881.52 | 148.73 | 2042.48 | 2082.91 | 188.05 | 2243.28 | 2274.93 |
| 109.48 | 1838.28 | 1881.74 | 148.80 | 2042.78 | 2083.09 | 188.12 | 2243.59 | 2275.30 |
| 109.55 | 1838.65 | 1882.23 | 148.87 | 2043.07 | 2083.52 | 188.19 | 2243.85 | 2275.45 |
| 109.62 | 1838.95 | 1882.44 | 148.93 | 2043.31 | 2083.71 | 188.25 | 2244.21 | 2275.61 |
| 109.68 | 1839.38 | 1882.65 | 149.00 | 2043.67 | 2083.89 | 188.32 | 2244.56 | 2276.18 |
| 109.75 | 1839.81 | 1883.42 | 149.07 | 2044.08 | 2084.56 | 188.39 | 2244.87 | 2276.34 |
| 109.82 | 1840.18 | 1883.90 | 149.13 | 2044.38 | 2084.98 | 188.45 | 2245.18 | 2276.70 |
| 109.88 | 1840.54 | 1884.11 | 149.20 | 2044.63 | 2085.16 | 188.52 | 2245.44 | 2276.86 |
| 109.95 | 1840.83 | 1884.30 | 149.27 | 2044.99 | 2085.35 | 188.59 | 2245.80 | 2277.02 |
| 110.02 | 1841.26 | 1885.06 | 149.33 | 2045.34 | 2086.01 | 188.65 | 2246.21 | 2277.59 |
| 110.08 | 1841.75 | 1885.26 | 149.40 | 2045.65 | 2086.19 | 188.72 | 2246.52 | 2277.96 |
| 110.15 | 1842.11 | 1885.73 | 149.47 | 2045.95 | 2086.61 | 188.79 | 2246.78 | 2278.13 |
| 110.22 | 1842.40 | 1885.93 | 149.53 | 2046.19 | 2086.80 | 188.85 | 2247.14 | 2278.29 |
| 110.28 | 1842.83 | 1886.12 | 149.60 | 2046.56 | 2086.98 | 188.92 | 2247.51 | 2278.86 |
| 110.35 | 1843.25 | 1886.86 | 149.67 | 2046.98 | 2087.63 | 188.99 | 2247.76 | 2279.03 |
| 110.42 | 1843.60 | 1887.33 | 149.73 | 2047.28 | 2088.05 | 189.05 | 2248.13 | 2279.20 |
| 110.48 | 1843.96 | 1887.51 | 149.80 | 2047.52 | 2088.24 | 189.12 | 2248.50 | 2279.78 |
| 110.55 | 1844.24 | 1887.69 | 149.87 | 2047.89 | 2088.41 | 189.19 | 2248.82 | 2279.95 |
| 110.62 | 1844.67 | 1888.43 | 149.93 | 2048.25 | 2089.06 | 189.25 | 2249.14 | 2280.32 |
| 110.68 | 1845.14 | 1888.60 | 150.00 | 2048.55 | 2089.25 | 189.32 | 2249.42 | 2280.50 |
| 110.75 | 1845.49 | 1889.05 | 150.07 | 2048.86 | 2089.66 | 189.39 | 2249.79 | 2280.67 |
| 110.82 | 1845.78 | 1889.22 | 150.13 | 2049.10 | 2089.84 | 189.45 | 2250.22 | 2281.25 |
| 110.88 | 1846.19 | 1889.39 | 150.20 | 2049.47 | 2090.01 | 189.52 | 2250.55 | 2281.64 |
| 110.95 | 1846.61 | 1890.11 | 150.27 | 2049.89 | 2090.67 | 189.59 | 2250.83 | 2281.82 |
| 111.02 | 1846.95 | 1890.55 | 150.33 | 2050.20 | 2091.08 | 189.65 | 2251.22 | 2281.99 |
| 111.08 | 1847.30 | 1890.71 | 150.40 | 2050.44 | 2091.26 | 189.72 | 2251.61 | 2282.59 |
| 111.15 | 1847.57 | 1890.87 | 150.47 | 2050.81 | 2091.43 | 189.79 | 2251.95 | 2282.77 |
| 111.22 | 1847.98 | 1891.58 | 150.53 | 2051.17 | 2092.08 | 189.85 | 2252.29 | 2283.16 |
| 111.28 | 1848.46 | 1891.73 | 150.60 | 2051.47 | 2092.25 | 189.92 | 2252.58 | 2283.35 |
| 111.35 | 1848.80 | 1892.16 | 150.67 | 2051.78 | 2092.66 | 189.99 | 2252.98 | 2283.53 |
| 111.42 | 1849.07 | 1892.31 | 150.73 | 2052.03 | 2092.83 |        |         |         |
| 111.48 | 1849.48 | 1892.46 | 150.80 | 2052.40 | 2093.01 |        |         |         |

## Approximation of hydration isotherms

Hill equation used for approximation of each isotherm step:

$$A = S \cdot C \cdot a_w^N / (1 + C \cdot a_w^N)$$

, where  $A$  is hydration (mol water / mol CD) at water activity  $a_w$ ,  $S$  is hydration at saturation,  $C$  – sorption constant,  $N$  – cooperativity parameter. Two-step isotherms were approximated as a sum of two single steps.

For isotherms fitted by Hill equation,  $a_{0.5S}$  (water activity at 50% saturation of step) can be calculated using the equation:

$$a_{0.5S} = C^{-1/N}$$

Table A3. Parameters of hydration isotherms for  $\beta$ CD polymorphs and HP $\beta$ CD.

|                    | $S$ , mol water<br>per mol CD | $a_{0.5S}$ | $C$                 | $N$ | $\sigma$ |
|--------------------|-------------------------------|------------|---------------------|-----|----------|
| polymorph I<br>[1] | 9.2                           | 0.26       | $8.4 \cdot 10^1$    | 3.3 | 0.01     |
|                    | 2.2                           | 0.97       | $4.3 \cdot 10^1$    | 126 |          |
| polymorph<br>III   | 2.7                           | 0.09       | $1.1 \cdot 10^7$    | 6.8 | 0.006    |
|                    | 1.6                           | 0.30       | $3.7 \cdot 10^{10}$ | 20  |          |
| HP $\beta$ CD      | 2.2                           | 0.04       | $6.4 \cdot 10^3$    | 3.8 | 0.02     |

[1] A.K. Gatiatulin, M.A. Ziganshin, G.F. Yumaeva, A.T. Gubaidullin, K. Suwińska, V. V. Gorbachuk, Using water-mimic organic compounds to activate guest inclusion by initially dry beta-cyclodextrin, RSC Adv. 6 (2016) 61984–61995. <https://doi.org/10.1039/C6RA11378H>
